# Supplementary material for: An operationally simple, palladium catalysed dehydrogenative cross-coupling reaction of pyridine N-oxides and thiazoles “on water”
Source: Royal Society of Chemistry journal article supplement (doi:10.1039/c3ra44411b), 2014-01-01
Supplement: c3ra44411b1.pdf [file c3ra44411b1.pdf]

Supporting Information

For

**An operationally simple, palladium catalysed dehydrogenative cross-coupling reaction  
of pyridine *N*-oxides and thiazoles “on water”.**

Nicky J. Willis<sup>a</sup> and James M. Smith<sup>b\*</sup>

<sup>a</sup>*School of Biological and Chemical Sciences, Joseph Priestley Building, Queen Mary,  
University of London, Mile End Road, E3 4NS;*

<sup>b</sup>*Cancer Research Technology Ltd., Discovery Laboratories, Jonas Webb Building,  
Babraham Research Campus, Cambridge, CB22 3AT (UK).*

e-mail: n.j.willis@qmul.ac.uk<sup>a</sup> and jsmith@cancertechnology.com<sup>b</sup>.

**Table of Contents:**

|       |                                                                           |        |
|-------|---------------------------------------------------------------------------|--------|
| I.    | Materials and Instrumentation                                             | S2     |
| II.   | Representative Procedure For Initial Solvent Screen                       | S3     |
| III.  | Representative Procedure For Calculation of <sup>1</sup> H NMR Conversion | S4     |
| IV.   | General Experimental Procedure A                                          | S5     |
| V.    | General Experimental Procedure B                                          | S5     |
| VI.   | Determination of Kinetic Isotope Effect                                   | S6     |
| VII.  | Compound Data                                                             | S7-11  |
| VIII. | NMR Spectra and HRMS Data                                                 | S12-27 |

**I. Materials and Instrumentation.** Unless otherwise stated, commercially available reagents were used as supplied. All reactions requiring anhydrous conditions were conducted in dried apparatus under an atmosphere of nitrogen. Thermal heating was conducted in 10 ml thick walled microwave vials (Biotage) fitted with crimp top teflon seals. Analytical thin-layer chromatography (TLC) was performed on silica gel plates (0.25 mm) precoated with a fluorescent indicator. Standard flash chromatography procedures were performed using Kieselgel 60 (40-63  $\mu\text{m}$ ) or with a TeleDyne Isco CombiFlash Rf automated purification system.

Infrared spectra were recorded in the range 4000-600  $\text{cm}^{-1}$ , using a Bruker Tensor 37 FTIR machine equipped with a PIKE MIRacle ATR accessory.  $^1\text{H}$  NMR spectra recorded during the optimisation study using an Oxford Instruments AS400 9.4 Tesla 400MHz magnet with a 5 mm BBO BB- $^1\text{H}$  probe and an AVANCE/DPX400 console and final  $^1\text{H}$ ,  $^{13}\text{C}$  and  $^{19}\text{F}$  NMR spectra were recorded using a Bruker AV400 NMR. Chemical shifts  $\delta$  are reported in ppm (relative to  $\delta_{\text{H}}$   $\text{CHCl}_3$  (7.27) and  $\delta_{\text{C}}$   $\text{CDCl}_3$  (77.0) unless otherwise stated) and multiplicity of signals are denoted s = singlet, d = doublet, t = triplet and m = multiplet respectively, with coupling constants ( $J$ ) reported in hertz (Hz). Structural interpretations and assignments were made based upon COSY, HSQC, HMQC, DEPT 135, DEPT 90 and NOESY experiments. High resolution mass spectra (HRMS) were obtained by the EPSRC National Mass Service (Swansea) using a double focussing mass spectrometer (Finnigan MAT 95 XP).

## II. Representative Procedure For Initial Solvent Screen

Pyridine *N*-oxide (285 mg, 3.00 mmol, 4.0 equiv.), 2,4-dimethyl-thiazole (80  $\mu$ l, 0.75 mmol, 1.0 equiv.),  $\text{Ag}_2\text{CO}_3$  (476 mg, 1.73 mmol, 2.3 equiv.),  $\text{Pd}(\text{OAc})_2$  (16.8 mg, 10 mol%), tetrabutylammonium bromide (48 mg, 0.15 mmol, 0.2 equiv.), Pyridine (242  $\mu$ l, 3.00 mmol, 4.0 equiv.) and DMF (3.00 ml) were charged into a 10 ml biotage microwave vial containing a magnetic stirrer bar. The vial was then sealed with a “crimp-cap” and the mixture was stirred at 135 °C (calibrated external temperature) for 22 h.

The mixture was then diluted with EtOAc (25ml), the organics were then filtered through phase-separating filter paper, washing with further EtOAc (2 x 10ml) before concentration under reduced pressure. An internal standard (1,3,5-trimethoxybenzene, 42 mg, 0.25mmol, 0.33 equiv.) and the crude mixture was dissolved in  $\text{CDCl}_3$  (5ml) and a  $^1\text{H}$  NMR was recorded to determine conversion of starting material upon integration of the signals highlighted as in **III** (overleaf).

### III. Representative Procedure For Calculation of $^1\text{H}$ NMR Conversion:

Pyridine *N*-oxide (428 mg, 4.50 mmol, 6.0 equiv.), 2,4-dimethyl-thiazole (80  $\mu\text{l}$ , 0.75 mmol, 1.0 equiv.),  $\text{Ag}_2\text{CO}_3$  (620mg, 2.25 mmol, 3.0 equiv.),  $\text{Pd}(\text{OAc})_2$  (4.5mg, 2.6 mol%), and tetrabutylammonium bromide (TBAB, 48 mg, 0.15 mmol, 0.2 equiv.), 2-Dicyclohexylphosphino-2',4',6'-triisopropylbiphenyl (36 mg, 0.075mmol, 10 mol%), Pyridine (116  $\mu\text{l}$ , 1.50 mmol, 2.0 equiv.) and distilled de-ionised water (1.00ml, 55.55mmol) were charged into a 10 ml biotage microwave vial. The vial was then sealed with a “crimp-cap” and the mixture was stirred at 100  $^\circ\text{C}$  (calibrated external temperature) for 22 h.

The mixture was then diluted with sat. aq. sodium citrate solution (25ml) and  $\text{CH}_2\text{Cl}_2$  (25ml) and the organics were then separated, filtered through phase-separating filter paper before concentration under reduced pressure. An internal standard (1,3,5-trimethoxybenzene, 42 mg, 0.25mmol, 0.33 equiv.) and the crude mixture was dissolved in  $\text{CDCl}_3$  (5ml) and a  $^1\text{H}$  NMR was recorded to determine conversion of starting material upon integration of the signals highlighted below (80%).

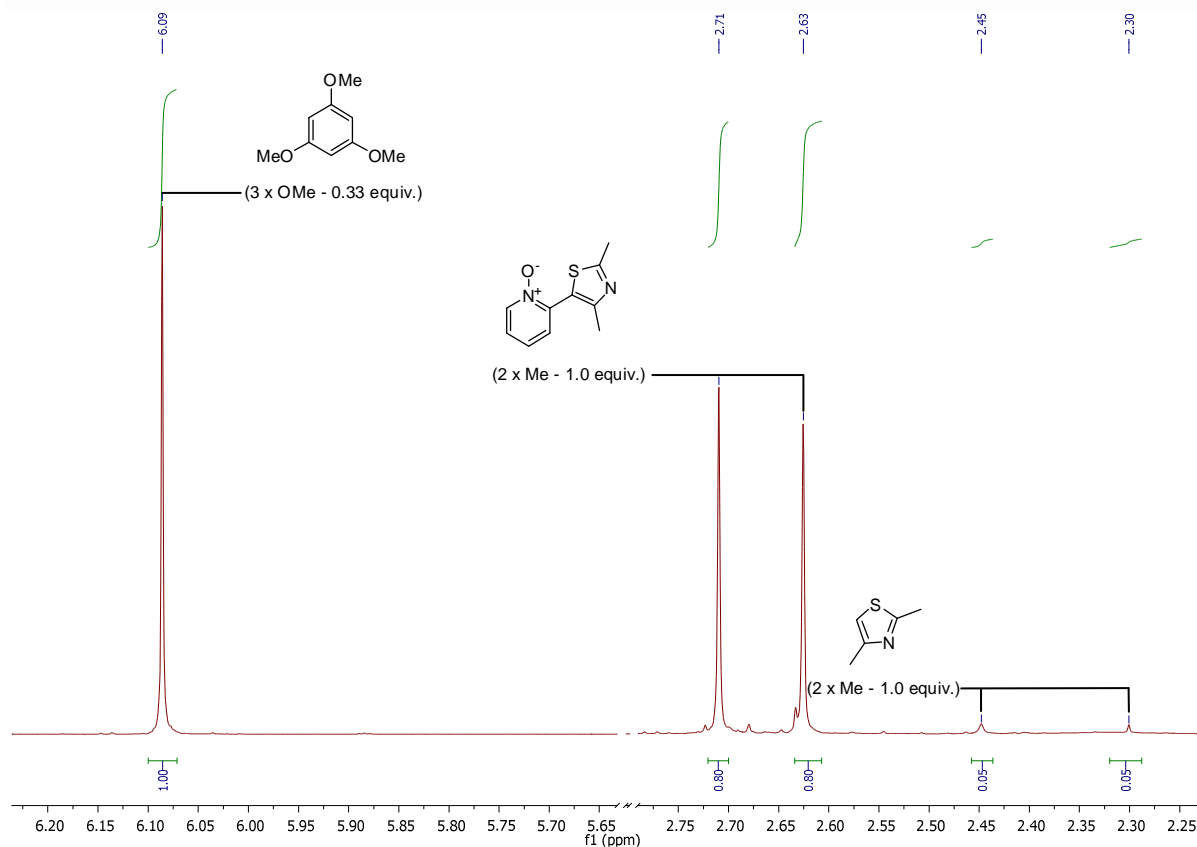

#### **IV General Experimental Procedure A:**

Pyridine *N*-oxide (4.50 mmol, 6.0 equiv.), thiazole (0.75 mmol, 1.0 equiv.), Ag<sub>2</sub>CO<sub>3</sub> (620mg, 2.25 mmol), Pd(OAc)<sub>2</sub> (4.5mg, 2.6 mol%), and tetrabutylammonium bromide (TBAB, 48 mg, 0.15 mmol, 0.2 equiv.), 2-Dicyclohexylphosphino-2',4',6'-triisopropylbiphenyl (36 mg, 0.075mmol, 10 mol%), Pyridine (116 μl, 1.50 mmol, 2.0 equiv.) and distilled de-ionised water (1.00ml, 55.55mmol) were charged into a 10 ml biotage microwave vial. The vial was then sealed with a “crimp-cap” and the mixture was stirred at 100 °C (calibrated external temperature) for 22 h.

The mixture was then diluted with sat. aq. sodium citrate solution (25ml) and CH<sub>2</sub>Cl<sub>2</sub> (25ml) and the organics were then separated, filtered through phase-separating filter paper before concentration under reduced pressure. The crude residue was then purified by silica gel chromatography (CH<sub>2</sub>Cl<sub>2</sub>:MeOH).

#### **V General Experimental Procedure B:**

Pyridine *N*-oxide (4.50 mmol, 6.0 equiv.), thiazole (0.75 mmol, 1.0 equiv.), Ag<sub>2</sub>CO<sub>3</sub> (620mg, 2.25 mmol), Pd(OAc)<sub>2</sub> (17 mg, 10 mol%), and tetrabutylammonium bromide (TBAB, 48 mg, 0.15 mmol, 0.2 equiv.), 2-Dicyclohexylphosphino-2',4',6'-triisopropylbiphenyl (36 mg, 0.075mmol, 10 mol%), Pyridine (116 μl, 1.50 mmol, 2.0 equiv.) and distilled de-ionised water (1.00ml, 55.55 mmol) were charged into a 10 ml biotage microwave vial. The vial was then sealed with a “crimp-cap” and the mixture was stirred at 100 °C (calibrated external temperature) for 48 h.

The mixture was then diluted with sat. aq. sodium citrate solution (25ml) and CH<sub>2</sub>Cl<sub>2</sub> (25ml) and the organics were then separated, filtered through phase-separating filter paper before concentration under reduced pressure. The crude residue was then purified by silica gel chromatography (CH<sub>2</sub>Cl<sub>2</sub>:MeOH).

## VI Determination of Kinetic Isotope Effect

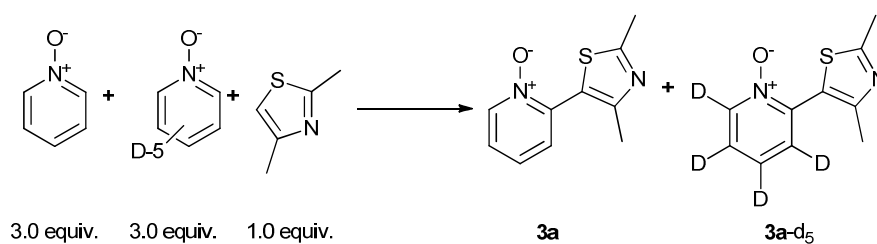

Pyridine-d<sub>5</sub> N-oxide (230mg, 2.30 mmol, 3 equiv.), pyridine N-oxide (219mg, 2.30 mmol, 3 equiv.), 4-Methyl-2-phenylthiazole (130 mg, 0.75 mmol, 1.0 equiv.), Ag<sub>2</sub>CO<sub>3</sub> (620mg, 2.25 mmol), Pd(OAc)<sub>2</sub> (4.5mg, 2.6 mol%), and tetrabutylammonium bromide (TBAB, 48 mg, 0.15 mmol, 0.2 equiv.), 2-Dicyclohexylphosphino-2',4',6'-triisopropylbiphenyl (36 mg, 0.075mmol, 10 mol%), Pyridine (116  $\mu$ l, 1.50 mmol, 2.0 equiv.) and distilled de-ionised water (1.00ml, 55.55 mmol) were charged into a 10 ml biotage microwave vial. The vial was then sealed with a “crimp-cap” and the mixture was stirred at 100 °C (calibrated external temperature) for 22 h.

The mixture was then diluted with sat. aq. sodium citrate solution (25ml) and CH<sub>2</sub>Cl<sub>2</sub> (25ml) and the organics were then separated, filtered through phase-separating filter paper before concentration under reduced pressure. The crude residue was then purified by silica gel chromatography (0 – 5 % MeOH in CH<sub>2</sub>Cl<sub>2</sub>) to afford a mixture of 2-(4-Methyl-2-phenylthiazol-5-yl)-pyridine-d<sub>4</sub> 1-oxide and 2-(4-Methyl-2-phenylthiazol-5-yl)-pyridine 1-oxide as a yellow solid. The ratio of **3a** to **3a-d<sub>5</sub>** was determined by <sup>1</sup>H NMR to be 3.5:1.

### 2-(2,4-Dimethyl-thiazol-5-yl)-pyridine 1-oxide (3a)

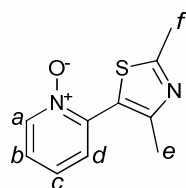

The titled compound was prepared from 2,4-dimethyl-thiazole and pyridine *N*-oxide according to **general procedure A**. Purified by silica gel chromatography using elution with 0 – 5 % MeOH in CH<sub>2</sub>Cl<sub>2</sub> to afford **3a** as a pale yellow solid (119 mg, 0.58 mmol, 77%).

$R_f = 0.33$  (CH<sub>2</sub>Cl<sub>2</sub>:MeOH,19:1); mp 57-58 °C; <sup>1</sup>H NMR (400 MHz, CDCl<sub>3</sub>): δ 8.30 (dd, 1H,  $J = 6.5, 0.9$  Hz, H<sub>a</sub>), 7.59 (dd, 1H,  $J = 8.1, 1.9$  Hz, H<sub>d</sub>), 7.32-7.26 (m, 1H, H<sub>c</sub>), 7.17 (ddd,  $J = 7.0, 6.5, 2.0$  Hz, H<sub>b</sub>), 2.71 (s, 3H, H<sub>e</sub>), 2.63 (s, 3H, H<sub>f</sub>); <sup>13</sup>C NMR (100 MHz, CDCl<sub>3</sub>): δ 167.5, 153.4, 143.0, 139.7, 126.0, 125.5, 123.6, 120.6, 18.6, 18.4; HRMS calculated for [C<sub>10</sub>H<sub>11</sub>N<sub>2</sub>OS]<sup>+</sup> = 207.0587, found = 207.0585; FT-IR (film, cm<sup>-1</sup>) 3349, 3089, 1656, 1480, 1423, 1256, 1031, 836, 763;

### 2-(2,4-Dimethyl-thiazol-5-yl)-quinoline 1-oxide (3b)

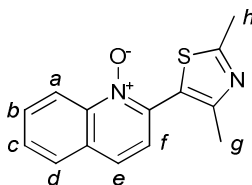

The titled compound was prepared from 2,4-dimethyl-thiazole and quinoline-*N*-oxide, according to **general procedure A**. Purified by silica gel chromatography using elution with 0 – 5 % MeOH in CH<sub>2</sub>Cl<sub>2</sub> to afford **3b** as a pale yellow solid (123 mg, 0.48 mmol, 64%).

$R_f = 0.43$  (CH<sub>2</sub>Cl<sub>2</sub>:MeOH,19:1); mp 108-109 °C; <sup>1</sup>H NMR (400 MHz, CDCl<sub>3</sub>): δ 8.81 (d, 1H,  $J = 8.8$  Hz, H<sub>a</sub>), 7.87 (dd, 1H,  $J = 8.1, 1.3$  Hz, H<sub>f</sub>), 7.83-7.73 (m, 3H, H<sub>b</sub>, H<sub>c</sub> and H<sub>d</sub>), 7.65 (ddd, 1H,  $J = 8.1, 6.9, 1.3$  Hz, H<sub>e</sub>), 2.74 (s, 6H, H<sub>g</sub> and H<sub>h</sub>); <sup>13</sup>C NMR (100 MHz, CDCl<sub>3</sub>): δ 167.3, 154.3, 141.5, 139.4, 130.9, 128.5, 128.5, 128.0, 125.1, 121.9, 121.4, 120.0, 19.1, 18.7; HRMS calculated for [C<sub>14</sub>H<sub>13</sub>N<sub>2</sub>OS]<sup>+</sup> = 257.0743, found = 257.0743; FT-IR (film, cm<sup>-1</sup>) 3055, 2922, 1598, 1451, 1370, 1322, 1295, 809, 748.

### 2-(2,4-Dimethyl-thiazol-5-yl)-4-methyl-pyridine 1-oxide (3c)

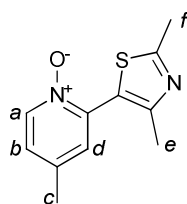

The titled compound was prepared from 2,4-dimethyl-thiazole and 4-Picoline *N*-oxide according to **general procedure B**. Purified by silica gel chromatography using elution with 0 – 5 % MeOH in CH<sub>2</sub>Cl<sub>2</sub> to afford **3c** as a pale yellow solid (119 mg, 0.54 mmol, 72%).

$R_f = 0.30$  (CH<sub>2</sub>Cl<sub>2</sub>:MeOH,19:1); mp 138-139 °C; <sup>1</sup>H NMR (400 MHz, CDCl<sub>3</sub>): δ 8.23 (d, 1H,  $J = 6.7$  Hz, H<sub>a</sub>), 7.40 (d, 1H,  $J = 2.3$  Hz, H<sub>d</sub>), 7.01 (dd, 2H,  $J = 6.7, 2.3$  Hz, H<sub>b</sub>), 2.70 (s, 3H, H<sub>f</sub>), 2.62 (s, 3H, H<sub>e</sub>), 2.41 (s, 3H, H<sub>c</sub>); <sup>13</sup>C NMR (100 MHz, CDCl<sub>3</sub>): δ 167.6, 153.3, 142.4, 139.2, 137.0, 126.6, 124.8, 120.9, 20.8, 18.9, 18.6; HRMS calculated for [C<sub>11</sub>H<sub>13</sub>N<sub>2</sub>OS]<sup>+</sup> = 221.0743, found = 221.0743; FT-IR (film, cm<sup>-1</sup>) 3050, 2919, 1646, 1509, 1439, 1242, 821, 784.

### 2-(2,4-Dimethyl-thiazol-5-yl)-5-methyl-pyridine 1-oxide (3d)

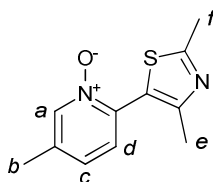

The titled compound was prepared from 2,4-dimethyl-thiazole and 3-Picoline *N*-oxide according to **general procedure B**. Purified by silica gel chromatography using elution with 0 – 5 % MeOH in CH<sub>2</sub>Cl<sub>2</sub> to afford **3d** as a pale yellow solid (97 mg, 0.44 mmol, 59%).

$R_f = 0.32$  (CH<sub>2</sub>Cl<sub>2</sub>:MeOH,19:1); mp 111 °C; <sup>1</sup>H NMR (400 MHz, CDCl<sub>3</sub>): δ 8.21 (s, 1H, H<sub>a</sub>), 7.50 (d, 1H,  $J = 8.2$  Hz, H<sub>d</sub>), 7.16 (d, 1H,  $J = 8.2$  Hz, H<sub>c</sub>), 2.70 (s, 3H, H<sub>f</sub>), 2.60 (s, 3H, H<sub>e</sub>), 2.35 (s, 3H, H<sub>b</sub>); <sup>13</sup>C NMR (100 MHz, CDCl<sub>3</sub>): δ 167.6, 153.1, 140.7, 139.8, 134.9, 127.4, 125.7, 121.1, 19.0, 18.6, 18.5; HRMS calculated for [C<sub>11</sub>H<sub>13</sub>N<sub>2</sub>OS]<sup>+</sup> = 221.0743, found = 221.0742; FT-IR (film, cm<sup>-1</sup>) 3390, 3054, 1653, 1517, 1491, 1391, 1266, 1201, 1020, 824, 625.



### 2-(2,4-Dimethyl-thiazol-5-yl)-6-methyl-pyridine 1-oxide (3e)

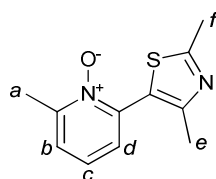

The titled compound was prepared from 2,4-dimethyl-thiazole and 2-Picoline *N*-oxide according to **general procedure B**. Purified by silica gel chromatography using elution with 0 – 5 % MeOH in CH<sub>2</sub>Cl<sub>2</sub> to afford **3e** as a colourless solid (95 mg, 0.44 mmol, 58%).

$R_f = 0.32$  (CH<sub>2</sub>Cl<sub>2</sub>:MeOH,19:1); mp 62 °C; <sup>1</sup>H NMR (400 MHz, CD<sub>3</sub>CN): δ 7.62 (dd, 1H,  $J = 7.6, 2.3$  Hz, H<sub>d</sub>), 7.33-7.25 (m, 2H, H<sub>b</sub> and H<sub>c</sub>), 2.62 (s, 3H, H<sub>f</sub>), 2.55 (s, 3H, H<sub>e</sub>), 2.45 (s, 3H, H<sub>a</sub>); <sup>13</sup>C NMR (100 MHz, CD<sub>3</sub>CN): δ 167.2, 154.0, 149.8, 143.1, 125.2, 125.2, 124.7, 122.2, 18.6, 18.5, 18.5; HRMS calculated for [C<sub>11</sub>H<sub>13</sub>N<sub>2</sub>OS]<sup>+</sup> = 221.0743, found = 221.0742; FT-IR (film, cm<sup>-1</sup>) 3340, 1655, 1564, 1446, 1379, 1222, 792.

### 2-(2,4-Dimethyl-thiazol-5-yl)-4-methoxy-pyridine 1-oxide (3f)

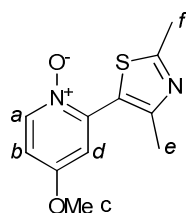

The titled compound was prepared from 2,4-dimethyl-thiazole and 4-Methoxypyridine *N*-oxide, according to **general procedure A**. Purified by silica gel chromatography using elution with 0 – 5 % MeOH in CH<sub>2</sub>Cl<sub>2</sub> to afford **3f** as a pale yellow solid (115 mg, 0.49 mmol, 65%).

$R_f = 0.27$  (CH<sub>2</sub>Cl<sub>2</sub>:MeOH,19:1); mp 79-80 °C; <sup>1</sup>H NMR (400 MHz, CDCl<sub>3</sub>): δ 8.25 (d, 1H,  $J = 7.4$  Hz, H<sub>a</sub>), 7.14 (d, 1H,  $J = 3.2$  Hz, H<sub>d</sub>), 6.78 (dd, 1H,  $J = 7.4, 3.2$  Hz, H<sub>b</sub>), 3.90 (s, 3H, H<sub>c</sub>), 2.70 (s, 3H, H<sub>f</sub>), 2.65 (s, 3H, H<sub>e</sub>); <sup>13</sup>C NMR (100 MHz, CDCl<sub>3</sub>): δ 168.0, 157.3, 153.5, 140.4, 122.4, 120.8, 110.9, 110.1, 56.2, 18.7, 18.5; HRMS calculated for [C<sub>11</sub>H<sub>13</sub>N<sub>2</sub>O<sub>2</sub>S]<sup>+</sup> = 237.0692, found = 237.0692; FT-IR (film, cm<sup>-1</sup>) 3075, 2921, 1620, 1507, 1482, 1296, 1216, 1016, 780.

#### 4-Chloro-2-(2,4-dimethyl-thiazol-5-yl)-pyridine 1-oxide (3g)

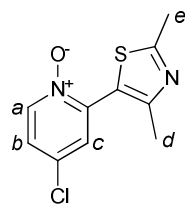

The titled compound was prepared from 2,4-dimethyl-thiazole and 4-Methoxypyridine *N*-oxide, according to **general procedure B**. Purified by silica gel chromatography using elution with 0 – 5 % MeOH in CH<sub>2</sub>Cl<sub>2</sub> to afford **3g** as a pale yellow semi-crystalline solid (47 mg, 0.20 mmol, 26%).

$R_f = 0.36$  (CH<sub>2</sub>Cl<sub>2</sub>:MeOH,19:1); mp 160-161 °C; <sup>1</sup>H NMR (400 MHz, CDCl<sub>3</sub>): δ 8.22 (d, 1H,  $J = 6.9$  Hz, H<sub>a</sub>), 7.57 (d, 1H,  $J = 2.8$  Hz, H<sub>d</sub>), 7.14 (dd, 1H,  $J = 6.9, 2.8$  Hz, H<sub>b</sub>), 2.67 (s, 3H, H<sub>f</sub>), 2.61 (s, 3H, H<sub>e</sub>); <sup>13</sup>C NMR (100 MHz, CDCl<sub>3</sub>): δ 168.2, 154.3, 143.9, 140.3, 131.4, 125.4, 123.6, 119.7, 18.7, 18.6; HRMS calculated for [C<sub>10</sub>H<sub>10</sub>N<sub>2</sub>ClS]<sup>+</sup> = 241.0197 found = 241.0198; FT-IR (film, cm<sup>-1</sup>) 3078, 1470, 1258, 1239, 1124, 821, 677.

#### 2-(2,4-Dimethyl-thiazol-5-yl)-3-fluoro-pyridine 1-oxide (3h)

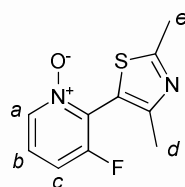

The titled compounds were prepared from 2,4-dimethyl-thiazole and 4-Methoxypyridine *N*-oxide, according to **general procedure B**. Purified by silica gel chromatography using elution with 0 – 5 % MeOH in CH<sub>2</sub>Cl<sub>2</sub> to afford **3h** as a colourless crystalline solid (52 mg, 0.29 mmol, 31%).

$R_f = 0.40$  (CH<sub>2</sub>Cl<sub>2</sub>:MeOH,19:1); mp 82-83 °C; <sup>1</sup>H NMR (400 MHz, CDCl<sub>3</sub>): 8.22 (d, 1H,  $J = 7.1$  Hz, H<sub>a</sub>), 7.28-7.20 (m, 1H, H<sub>b</sub>), 7.15 (dd, 1H,  $J = 7.5, 0.7$ , H<sub>c</sub>), 2.74 (s, 3H, H<sub>e</sub>), 2.35 (d,  $J = 2.6$  Hz, 3H, H<sub>d</sub>); <sup>13</sup>C NMR (100 MHz, CDCl<sub>3</sub>): δ 169.1, 158.4 (d,  $J = 253.2$  Hz), 155.4, 136.7, 124.1, 124.0, 114.7 (d,  $J = 2.5$  Hz), 113.4 (d,  $J = 22.6$  Hz), 19.3, 17.2 (d,  $J = 5.9$  Hz); <sup>19</sup>F (282 MHz, CDCl<sub>3</sub>): δ = -112.1; HRMS calculated for [C<sub>10</sub>H<sub>10</sub>N<sub>2</sub>OFS]<sup>+</sup> = 225.0492, found = 225.0492; FT-IR (film, cm<sup>-1</sup>) 3031, 1543, 1438, 1242, 1174, 1043, 821, 722.

### 2-(4-Methyl-2-phenyl-thiazol-5-yl)-pyridine 1-oxide (3i)

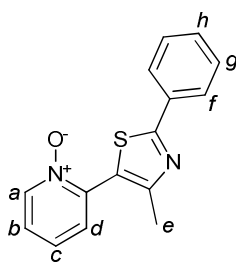

The titled compound was prepared from 4-Methyl-2-phenylthiazole and pyridine *N*-oxide according to **general procedure A**. Purified by silica gel chromatography using elution with 0 – 5 % MeOH in CH<sub>2</sub>Cl<sub>2</sub> to afford **3i** as a colourless solid (127 mg, 0.47 mmol, 63%).

$R_f = 0.43$  (CH<sub>2</sub>Cl<sub>2</sub>:MeOH,19:1); mp 82-83 °C; <sup>1</sup>H NMR (400 MHz, CDCl<sub>3</sub>): δ 8.39 (dd, 1H,  $J = 6.5, 1.2$  Hz, H<sub>a</sub>), 8.05-8.00 (m, 2H, H<sub>f</sub>), 7.75 (dd, 1H,  $J = 8.1, 1.9$  Hz, H<sub>d</sub>), 7.44 (m, 3H, H<sub>g</sub> and H<sub>h</sub>), 7.37 (ddd, 1H,  $J = 8.1, 7.6, 1.2$  Hz, H<sub>c</sub>), 7.23 (ddd, 1H,  $J = 7.6, 6.5, 2.0$  Hz, H<sub>b</sub>), 2.75 (s, 3H, H<sub>e</sub>); <sup>13</sup>C NMR (100 MHz, CDCl<sub>3</sub>): δ 168.4, 154.9, 143.1, 139.8, 133.5, 130.3, 129.0, 126.8, 125.8, 125.6, 123.6, 121.3, 19.0; HRMS calculated for [C<sub>15</sub>H<sub>13</sub>N<sub>2</sub>OS]<sup>+</sup> = 269.0743 found = 269.0744; FT-IR (film, cm<sup>-1</sup>) 3043, 1651, 1478, 1428, 1240, 1014, 758, 685.

### 2-(2-Methyl-4-phenyl-thiazol-5-yl)-pyridine 1-oxide (3j)

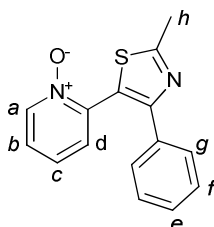

The titled compound was prepared from 2-Methyl-4-phenylthiazole and pyridine *N*-oxide according to **general procedure A**. Purified by silica gel chromatography using elution with 0 – 5 % MeOH in CH<sub>2</sub>Cl<sub>2</sub> to afford **3j** as a pale orange oil (142 mg, 0.53 mmol, 71%).

$R_f = 0.43$  (CH<sub>2</sub>Cl<sub>2</sub>:MeOH,19:1); <sup>1</sup>H NMR (400 MHz, CDCl<sub>3</sub>): δ 8.33 (dd, 1H,  $J = 6.5, 1.3$  Hz, H<sub>a</sub>), 7.55-7.50 (m, 2H, H<sub>g</sub>), 7.42-7.36 (m, 3H, H<sub>e</sub> and H<sub>f</sub>), 7.19 (dd, 1H,  $J = 8.1, 2.0$  Hz, H<sub>d</sub>), 7.12 (ddd, 1H,  $J = 7.5, 6.5, 2.0$  Hz, H<sub>b</sub>), 6.99 (ddd, 1H,  $J = 8.1, 7.5, 1.3$  Hz, H<sub>c</sub>), 2.78 (s, 3H, H<sub>h</sub>); <sup>13</sup>C NMR (100 MHz, CDCl<sub>3</sub>): δ 168.4, 156.7, 143.3, 139.7, 135.5, 129.4, 129.0, 128.9, 127.0, 125.1, 123.9, 121.2, 18.9; HRMS calculated for [C<sub>15</sub>H<sub>13</sub>N<sub>2</sub>OS]<sup>+</sup> = 269.0743, found = 269.043; FT-IR (film, cm<sup>-1</sup>) 3061, 1493, 1481, 1276, 881, 762, 701.

### 3a <sup>1</sup>H Spectrum

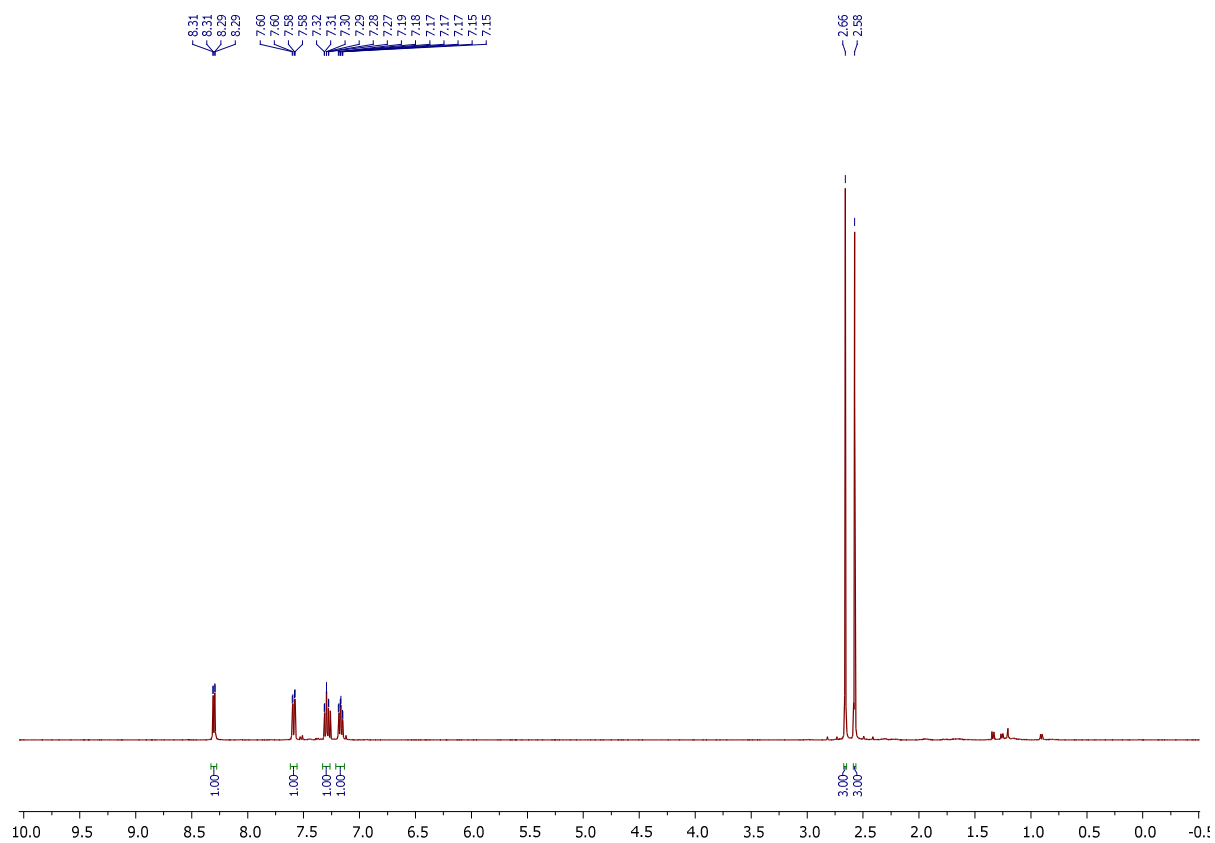

### 3a <sup>13</sup>C Spectrum

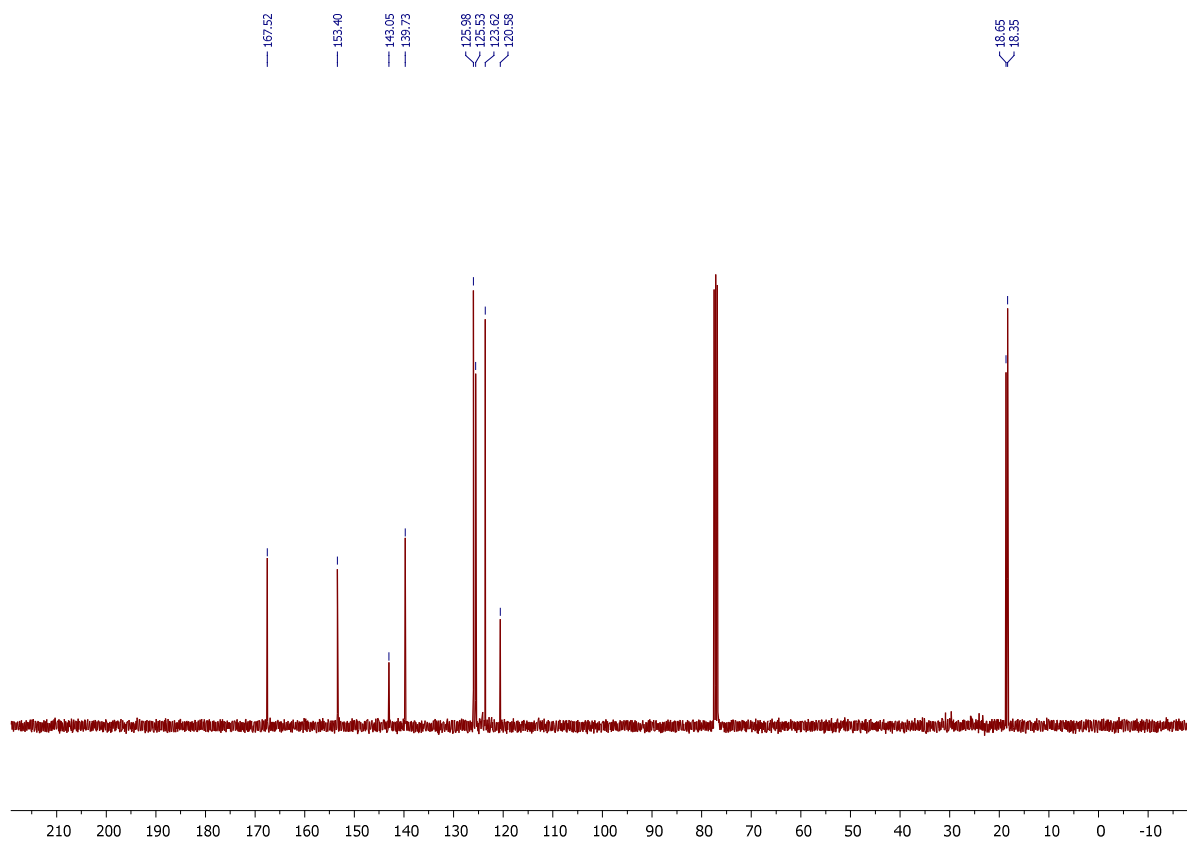

### 3a HRMS

CH3a MW=206?  
(MeOH)/MeOH + NH4OAc

EPSRC National Facility Swansea  
LTQ Orbitrap XL

Nicky John Willis  
07/05/2013 18:15:11

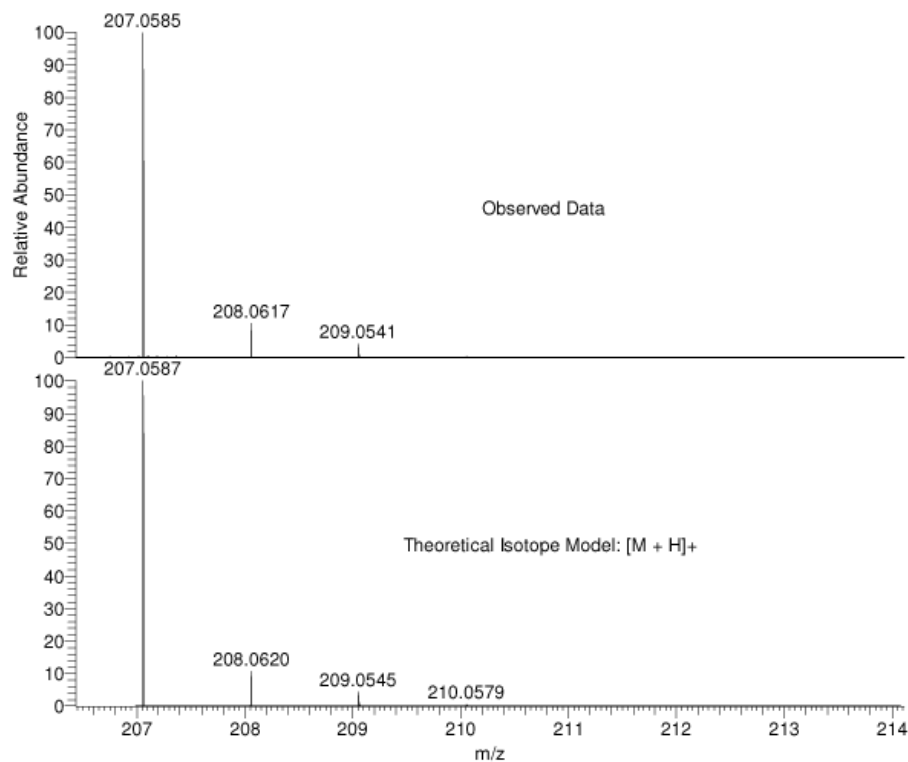

NL:  
2.38E7  
QMCBRA337-OJ-HNESP#34-  
47 RT: 0.81-1.17 AV: 14 T:  
FTMS + p NSI Full ms  
[120.00-2000.00]

NL:  
1.98E4  
C<sub>10</sub> H<sub>10</sub> N<sub>2</sub> OSH:  
C<sub>10</sub> H<sub>11</sub> N<sub>2</sub> O<sub>1</sub> S<sub>1</sub>  
p (gss, s /p:40) Chrg 1  
R: 100000 Res .Pwr . @FWHM

### 3b <sup>1</sup>H Spectrum

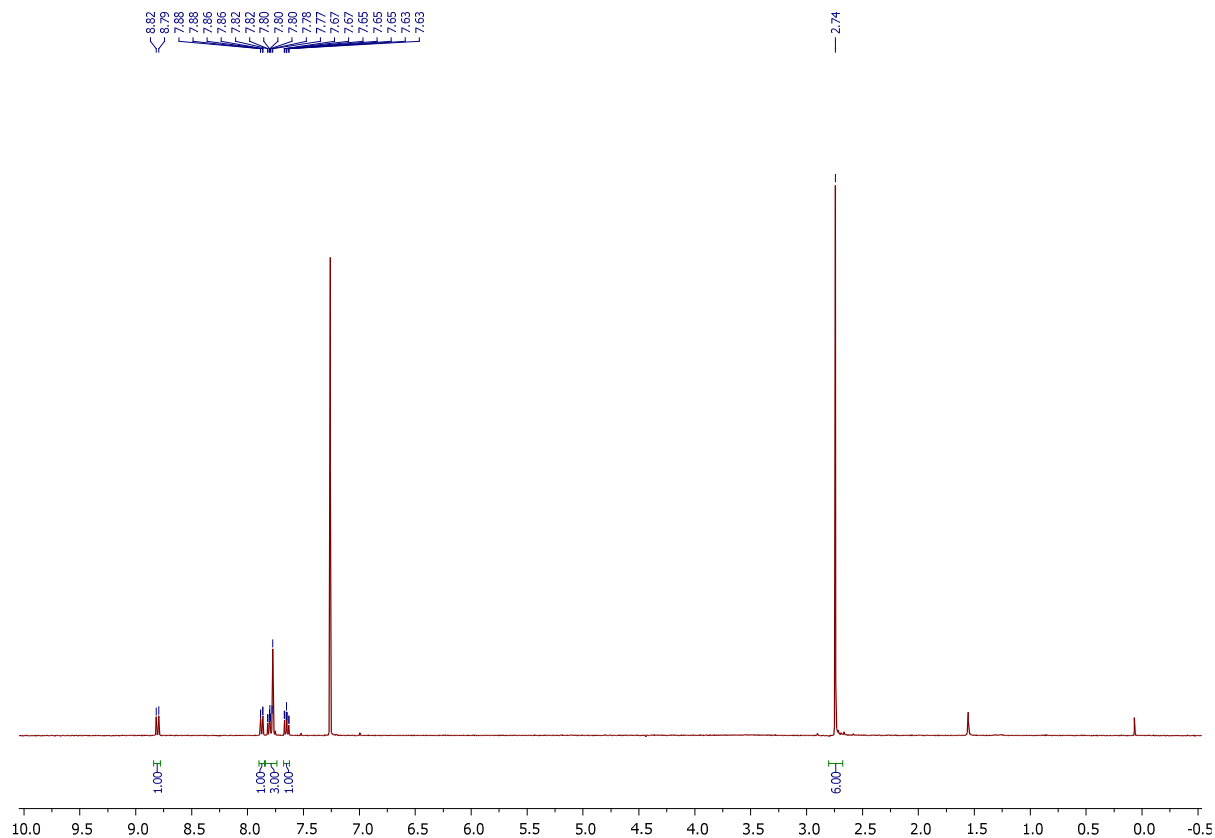

### 3b <sup>13</sup>C Spectrum

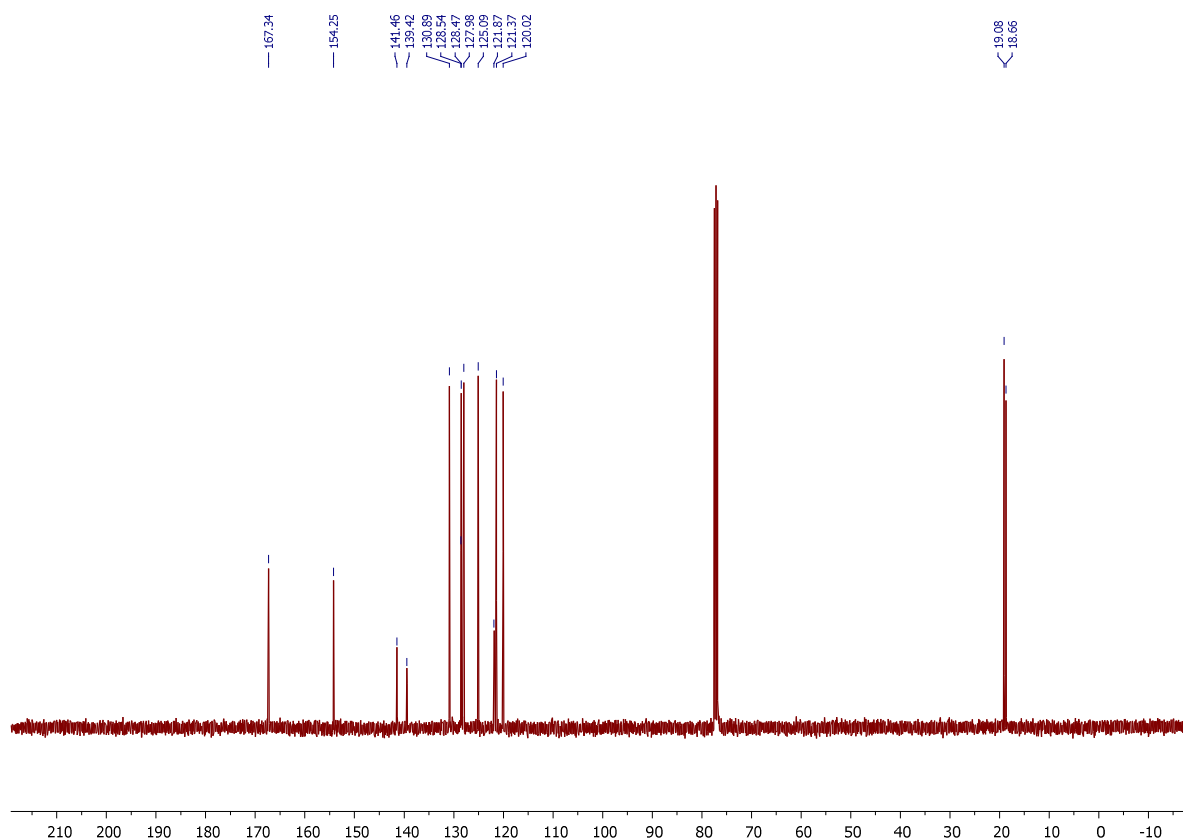

### 3b HRMS

CH3b MW=256?  
(MeOH)/MeOH + NH4OAc

EPSRC National Facility Swansea  
LTQ Orbitrap XL

Nicky John Willis  
07/05/2013 18:11:45

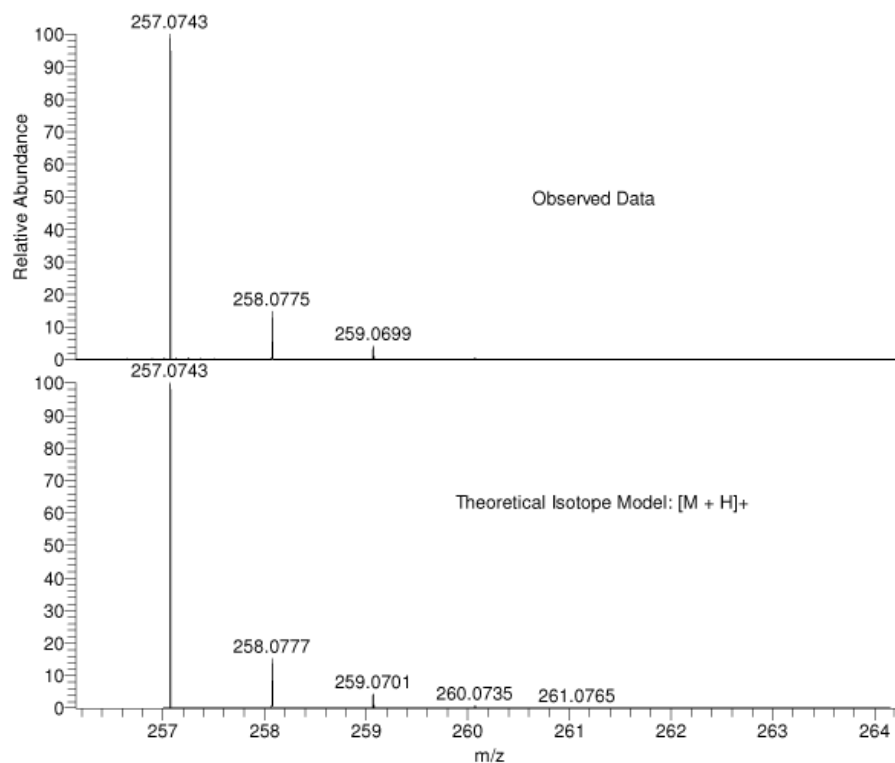

NL:  
3.37E7  
QMCBRA336-OJ-HNESP#36-  
51 RT: 0.85-1.28 AV: 16 T:  
FTMS + p NSI Full ms  
[120.00-2000.00]

NL:  
1.89E4  
C<sub>14</sub>H<sub>12</sub>N<sub>2</sub>OSH:  
C<sub>14</sub>H<sub>13</sub>N<sub>2</sub>O<sub>1</sub>S<sub>1</sub>  
p (gss, s /p:40) Chrg 1  
R: 100000 Res .Pwr . @FWHM

### 3c <sup>1</sup>H Spectrum

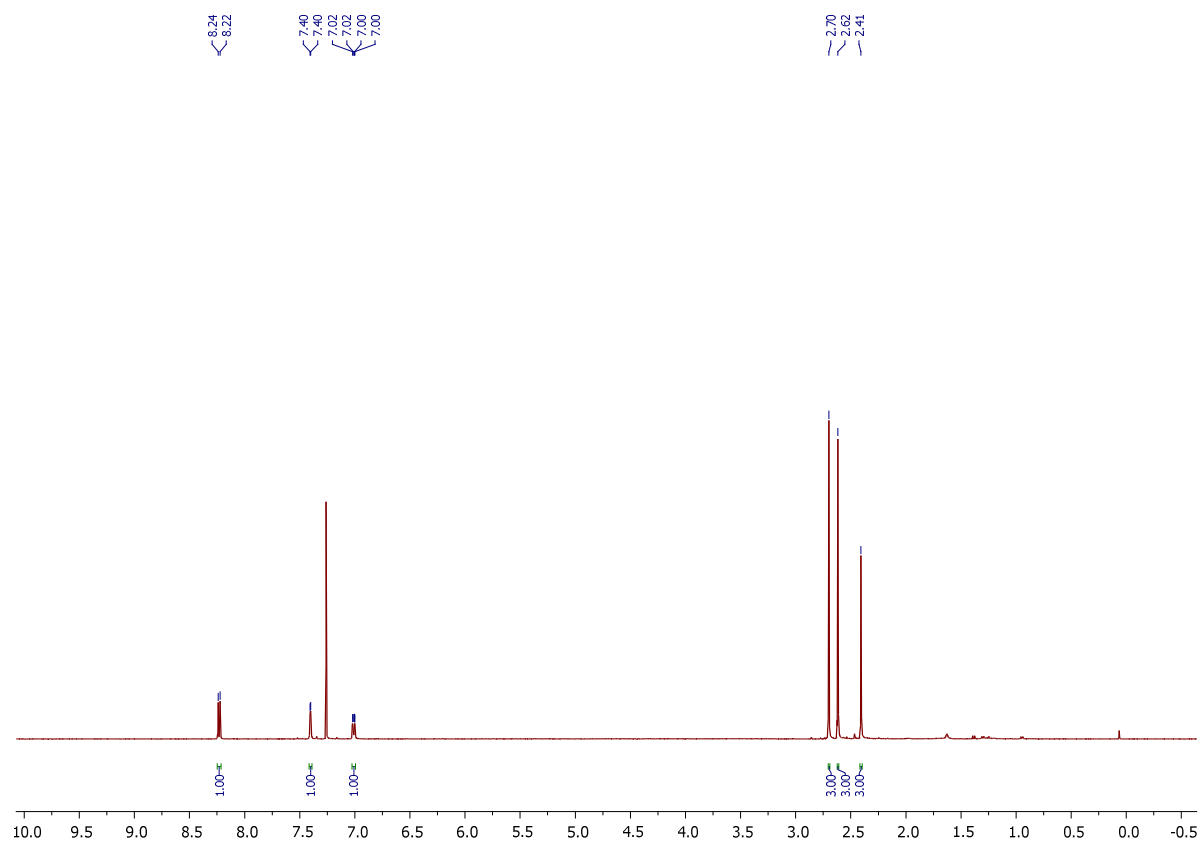

### 3c <sup>13</sup>C Spectrum

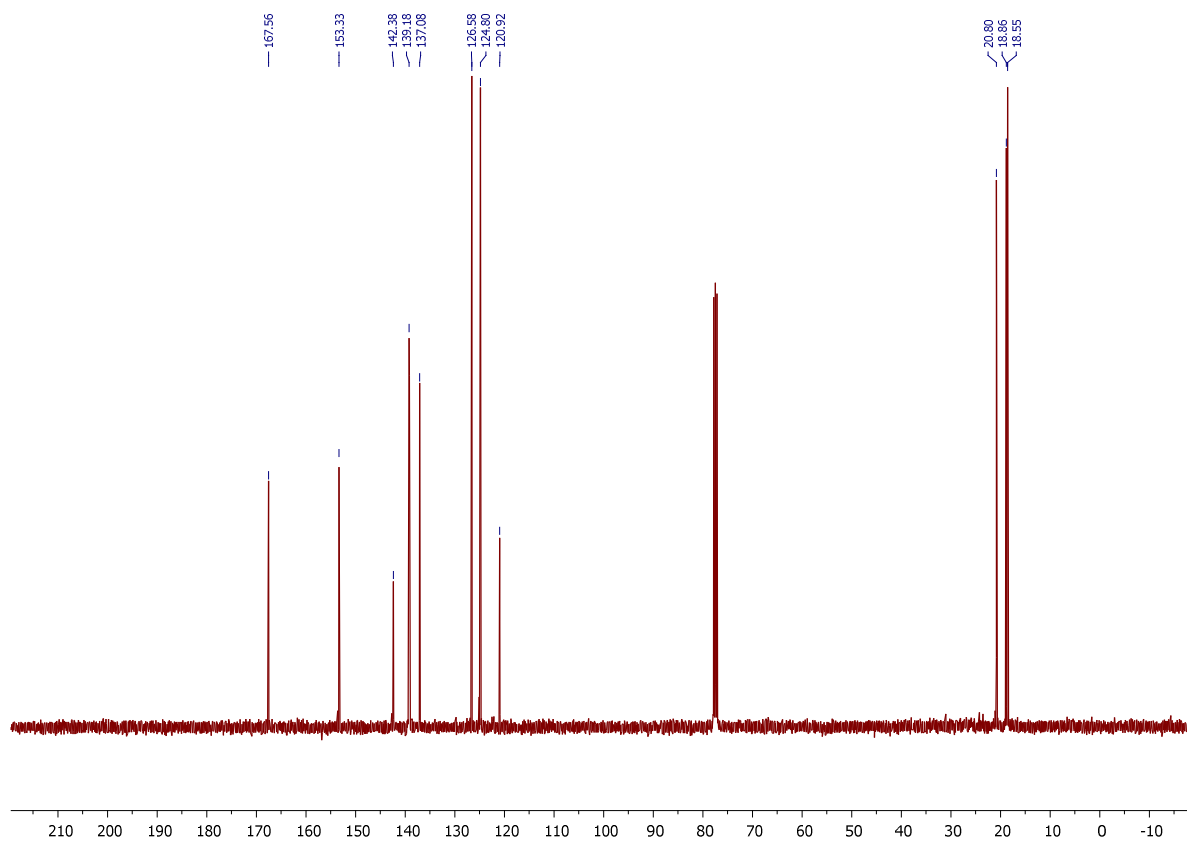

### 3c HRMS

CH3c MW=220?  
(MeOH)/MeOH + NH4OAc

EPSRC National Facility Swansea  
LTQ Orbitrap XL

Nicky John Willis  
07/05/2013 18:08:18

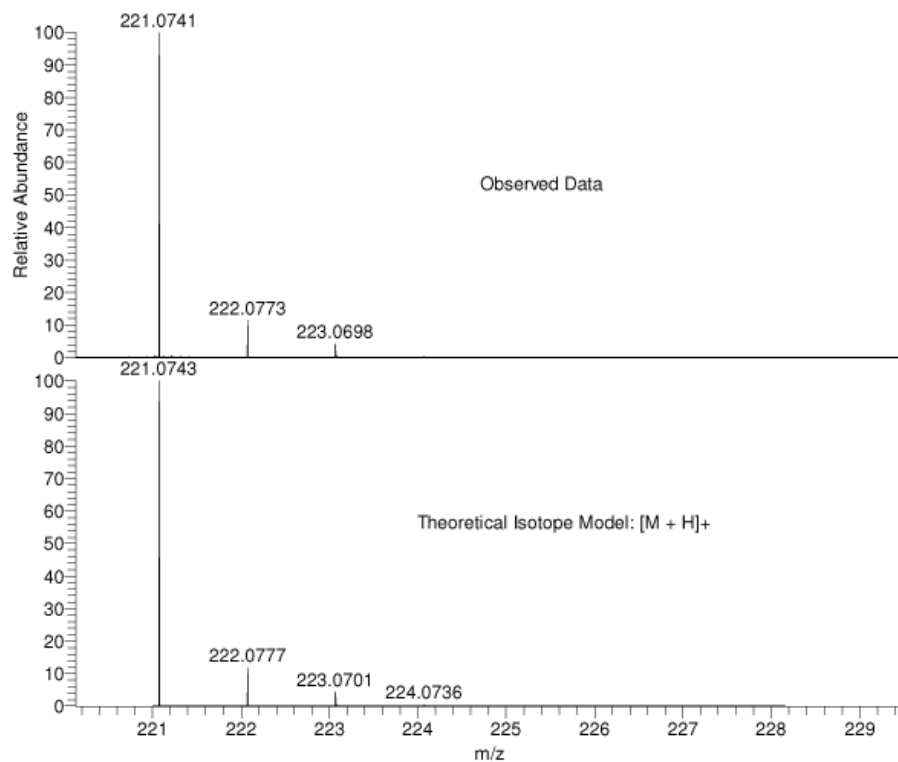

NL:  
1.42E7  
QMCBRA335-OJ-HNESP#33-  
48 RT: 0.77-1.19 AV: 16 T:  
FTMS + p NSI Full ms  
[120.00-2000.00]

NL:  
1.96E4  
C<sub>11</sub>H<sub>12</sub>N<sub>2</sub>OSH:  
C<sub>11</sub>H<sub>13</sub>N<sub>2</sub>O<sub>1</sub>S<sub>1</sub>  
p (gss, s /p:40) Chrg 1  
R: 100000 Res .Pwr . @FWHM

### 3d <sup>1</sup>H Spectrum

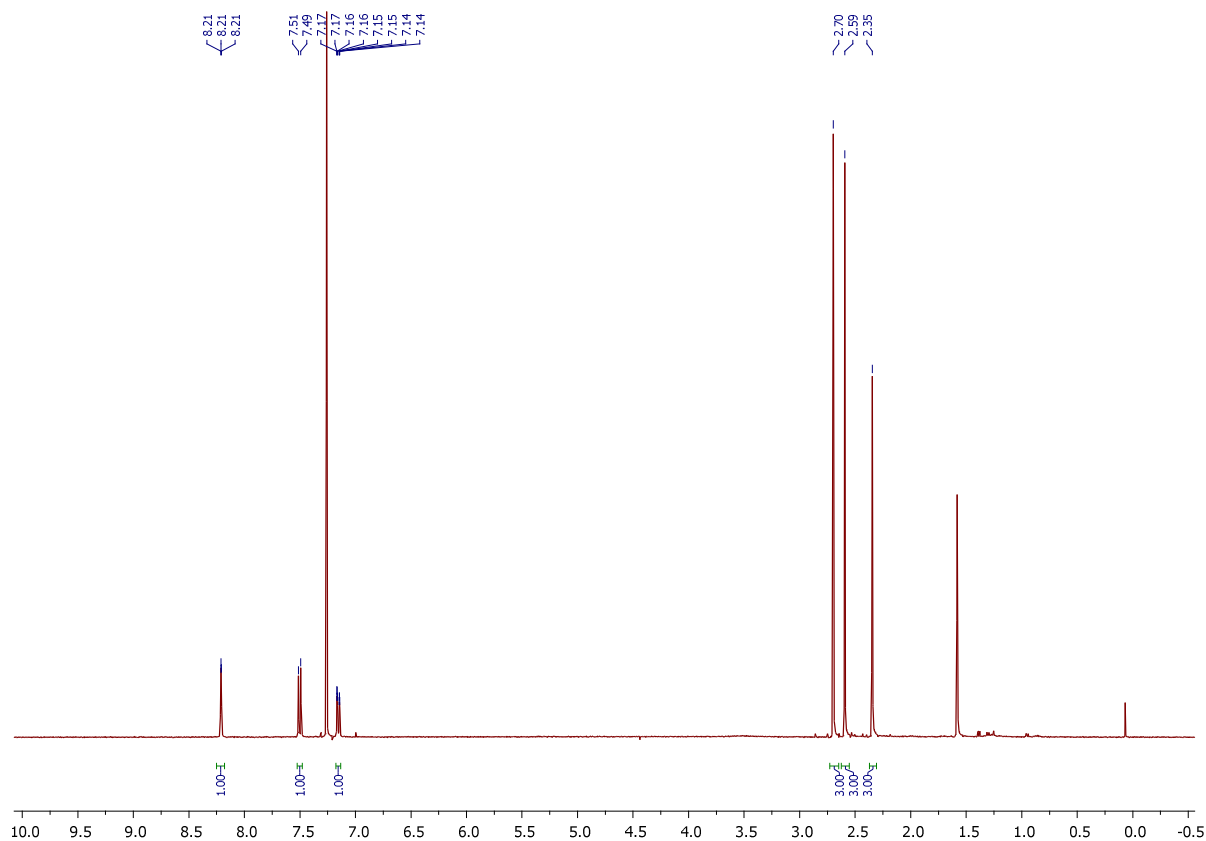



### 3d <sup>13</sup>C Spectrum

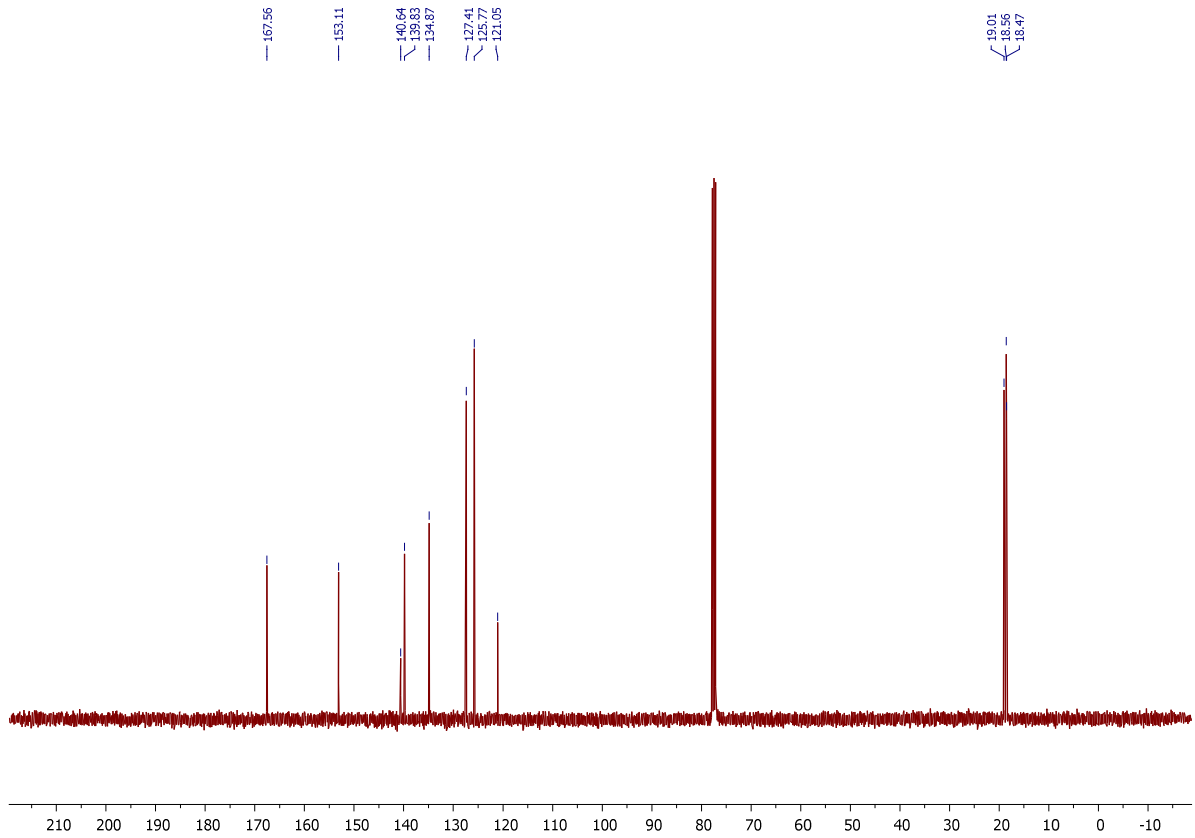

### 3d HRMS

CH3d MW=220?  
(MeOH)/MeOH + NH4OAc

EPSRC National Facility Swansea  
LTQ Orbitrap XL

Nicky John Willis  
07/05/2013 18:04:52

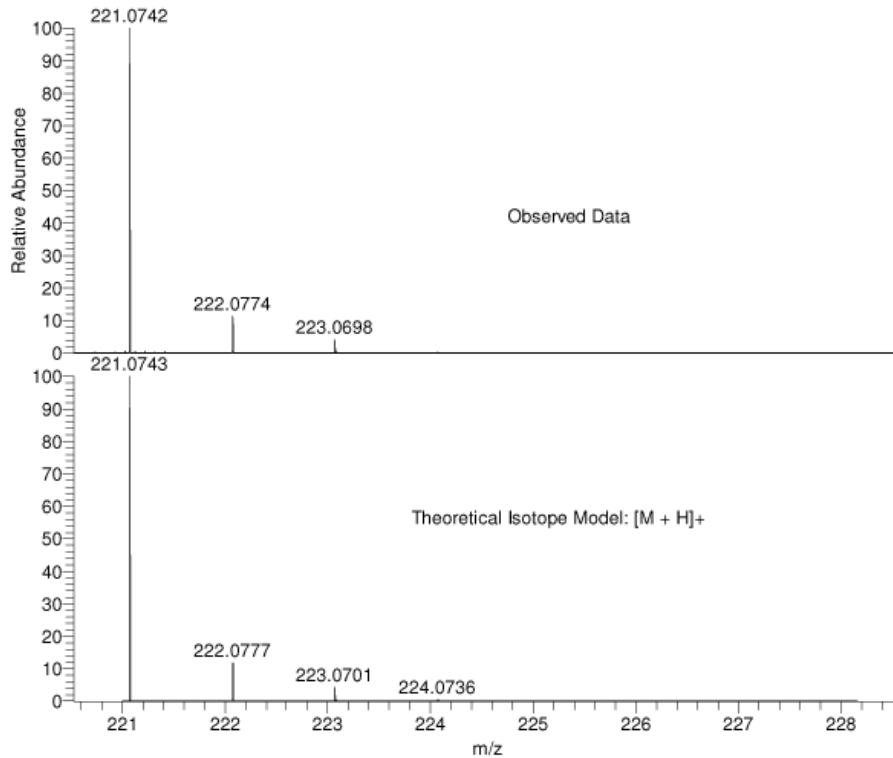

NL:  
2.06E7  
QMCBRA334-OJ-HNESP#35-  
48 RT: 0.82-1.19 AV: 14 T:  
FTMS + p NSI Full ms  
[120.00-2000.00]

NL:  
1.96E4  
C<sub>11</sub>H<sub>12</sub>N<sub>2</sub>OSH:  
C<sub>11</sub>H<sub>13</sub>N<sub>2</sub>O<sub>1</sub>S<sub>1</sub>  
p (gss, s /p:40) Chrg 1  
R: 100000 Res .Pwr . @FWHM

### 3e <sup>1</sup>H Spectrum

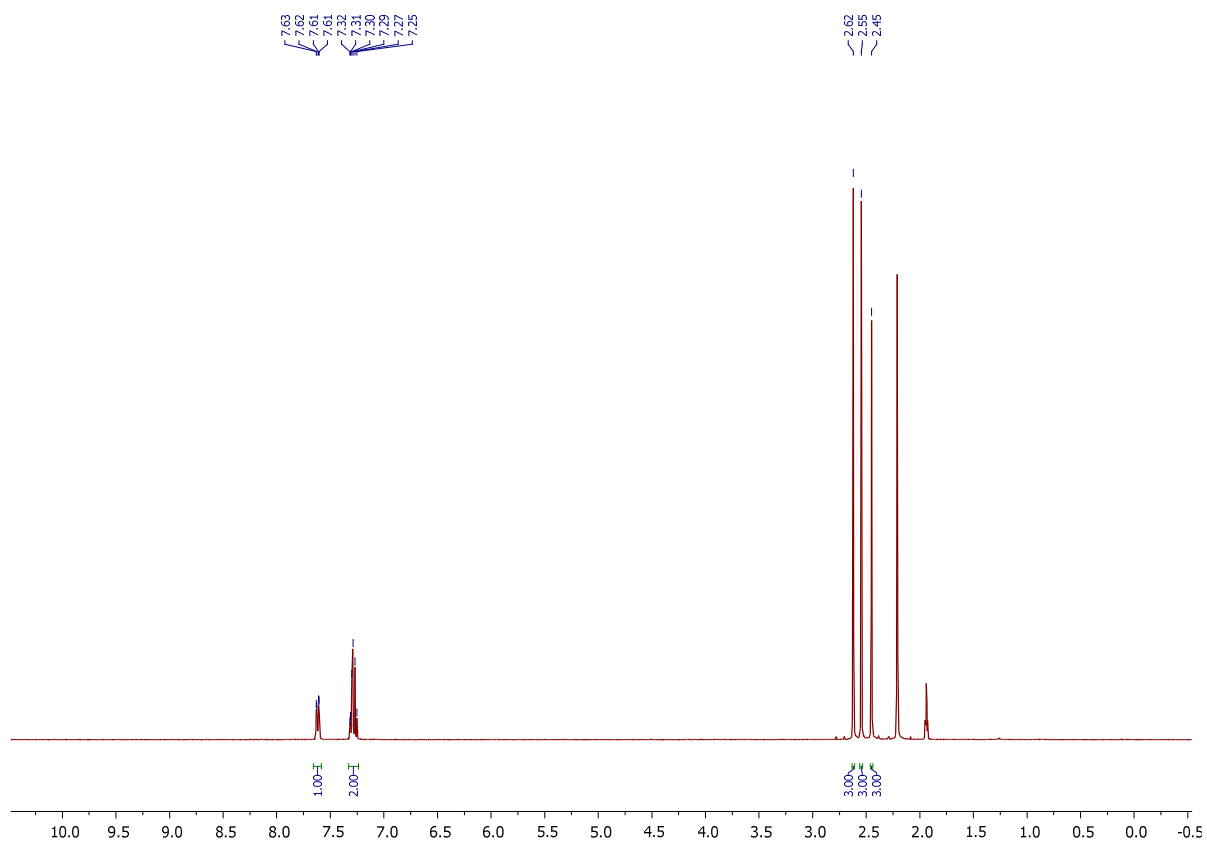

### 3e <sup>13</sup>C Spectrum

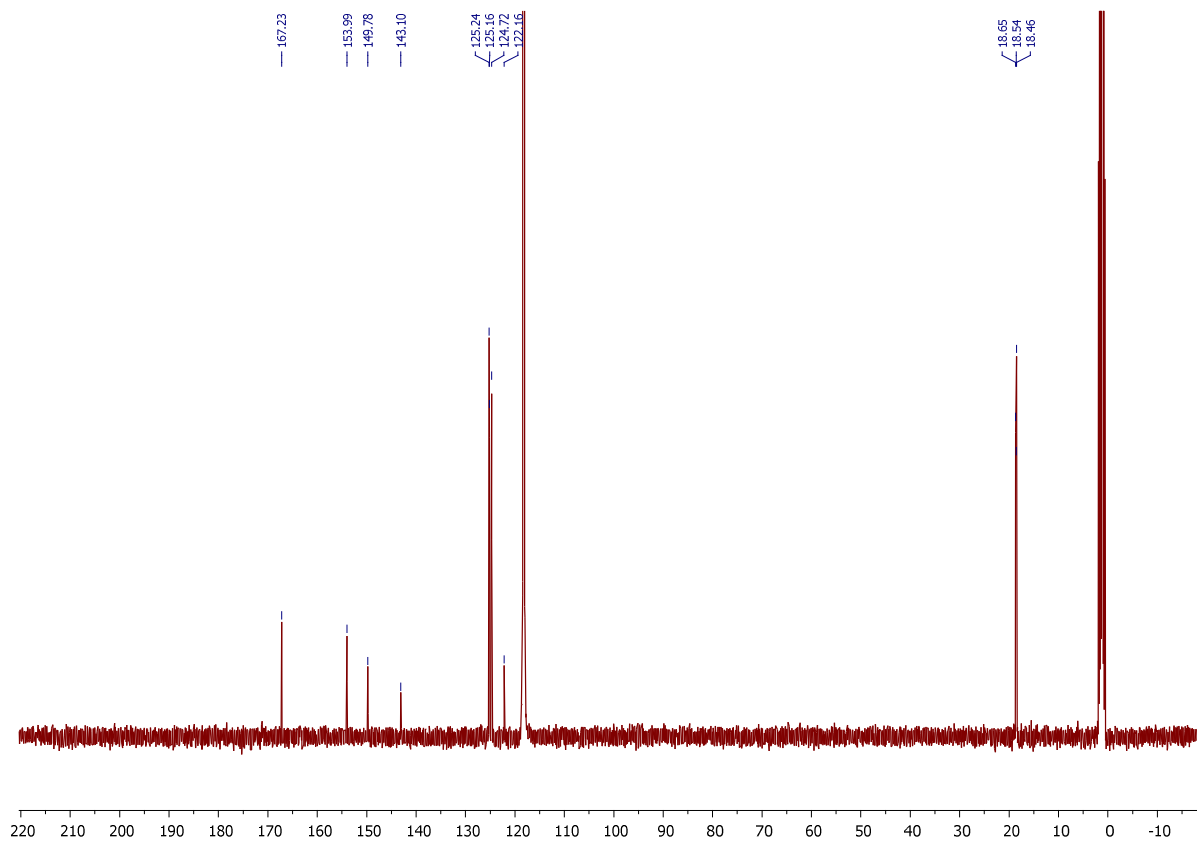

### 3e HRMS

CH3e MW=220?  
(MeOH)/MeOH + NH4OAc

EPSRC National Facility Swansea  
LTQ Orbitrap XL

Nicky John Willis  
07/05/2013 18:01:25

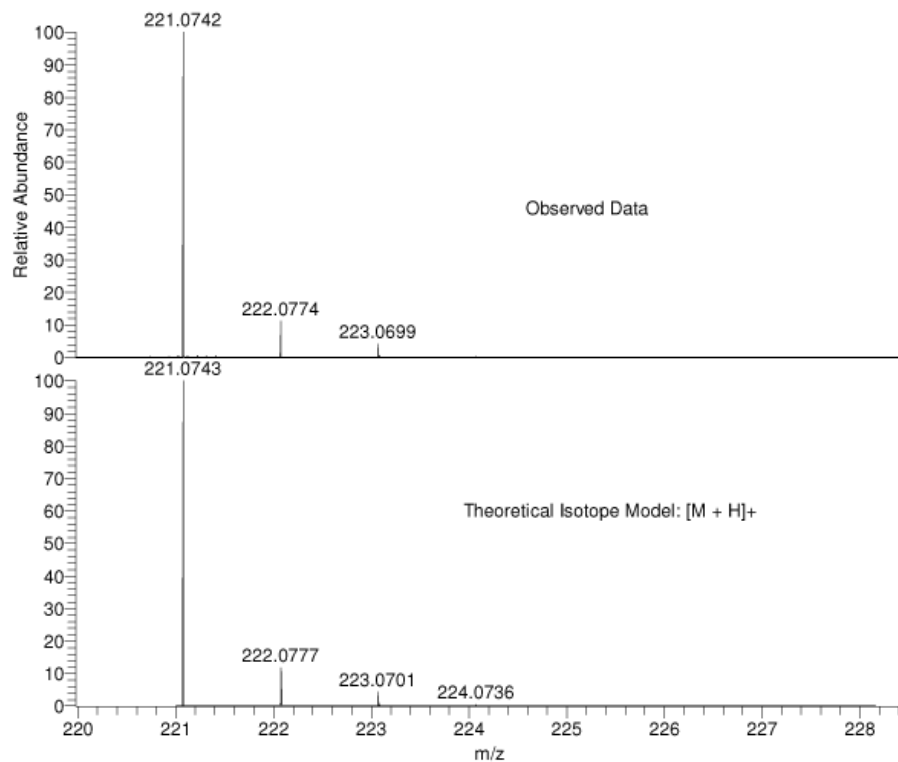

NL:  
9.04E6  
QMCBRA333-OJ-HNESP#33-49  
RT: 0.77-1.23 AV: 17 T:  
FTMS + p NSI Full ms  
[120.00-2000.00]

NL:  
1.96E4  
C<sub>11</sub>H<sub>12</sub>N<sub>2</sub>OSH:  
C<sub>11</sub>H<sub>13</sub>N<sub>2</sub>O<sub>1</sub>S<sub>1</sub>  
p (gss, s /p:40) Chrg 1  
R: 100000 Res .Pwr . @FWHM

### 3f <sup>1</sup>H Spectrum

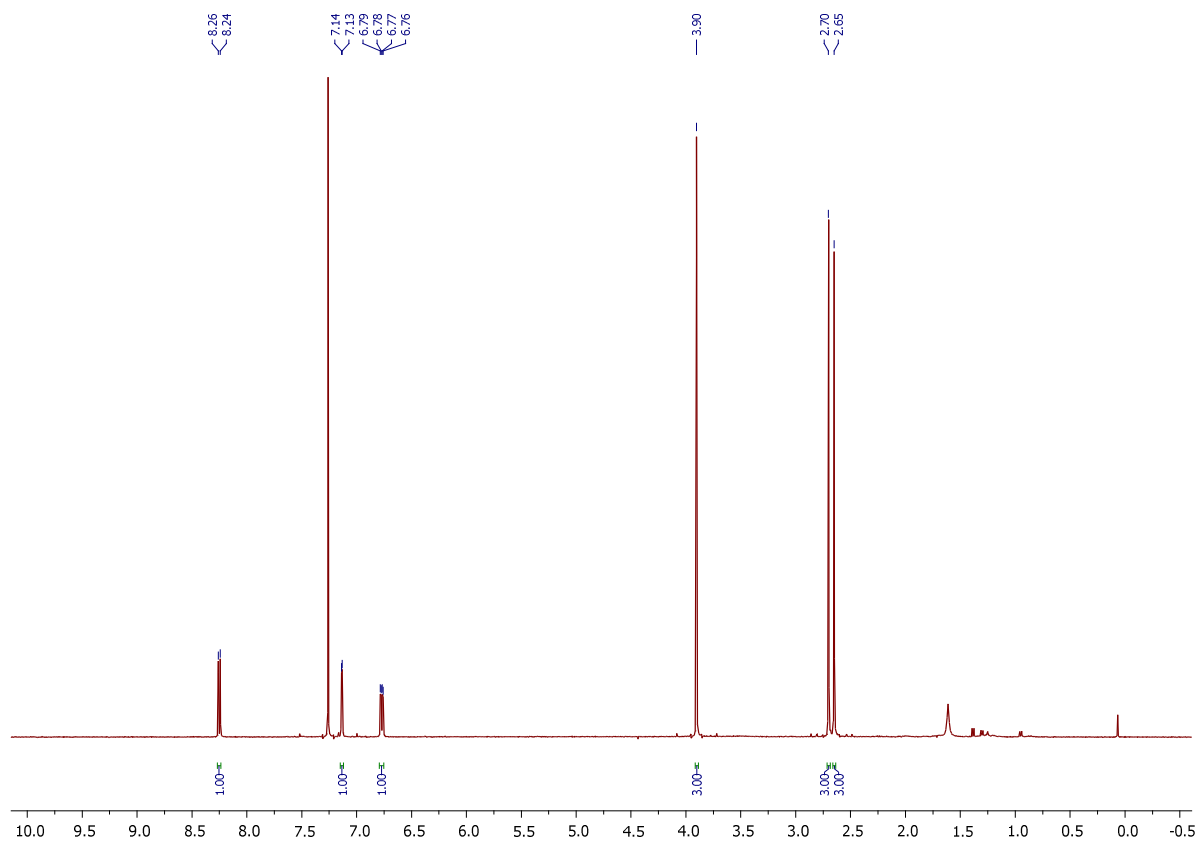

### 3f <sup>13</sup>C Spectrum

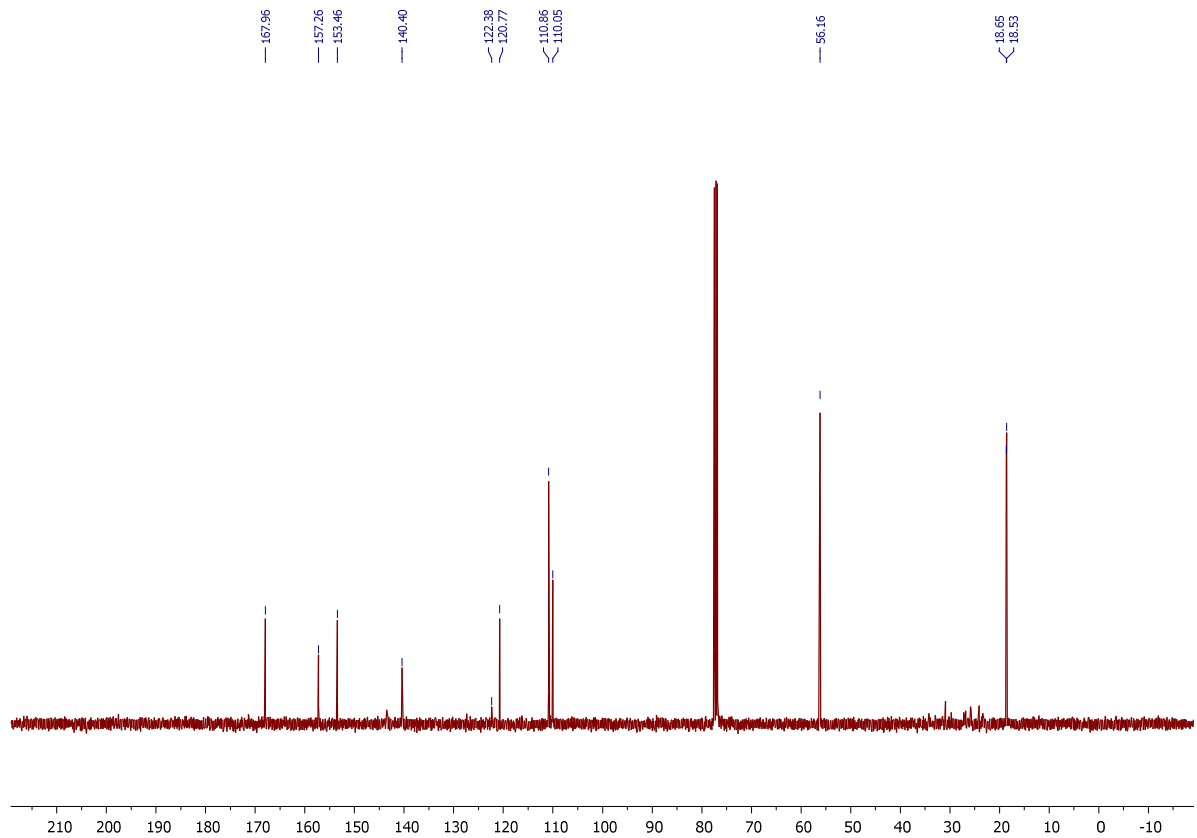

### 3f HRMS

CH3f MW=236?  
(MeOH)/MeOH + NH4OAc

EPSRC National Facility Swansea  
LTQ Orbitrap XL

Nicky John Willis  
07/05/2013 17:57:59

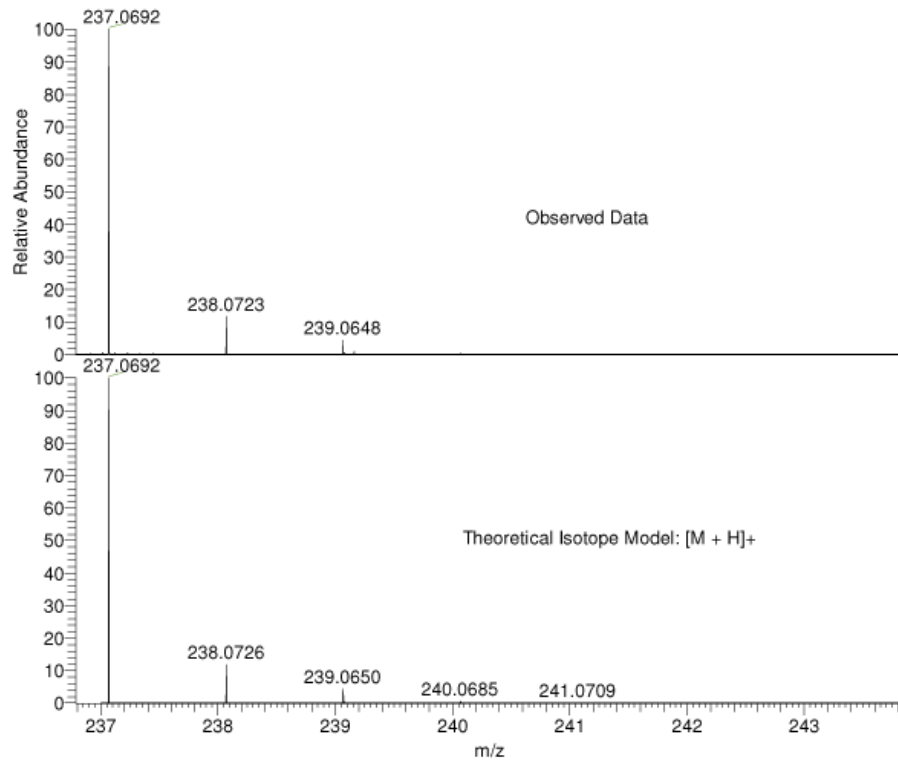

NL:  
3.45E7  
QMCBRA332-OJ-HNESP#33-  
43 RT: 0.77-1.06 AV: 11 T:  
FTMS + p NSI Full ms  
[120.00-2000.00]

NL:  
1.95E4  
C<sub>11</sub>H<sub>12</sub>N<sub>2</sub>O<sub>2</sub>SH:  
C<sub>11</sub>H<sub>13</sub>N<sub>2</sub>O<sub>2</sub>S<sub>1</sub>  
p (gss, s /p:40) Chrg 1  
R: 100000 Res .Pwr . @FWHM

### 3g <sup>1</sup>H Spectrum

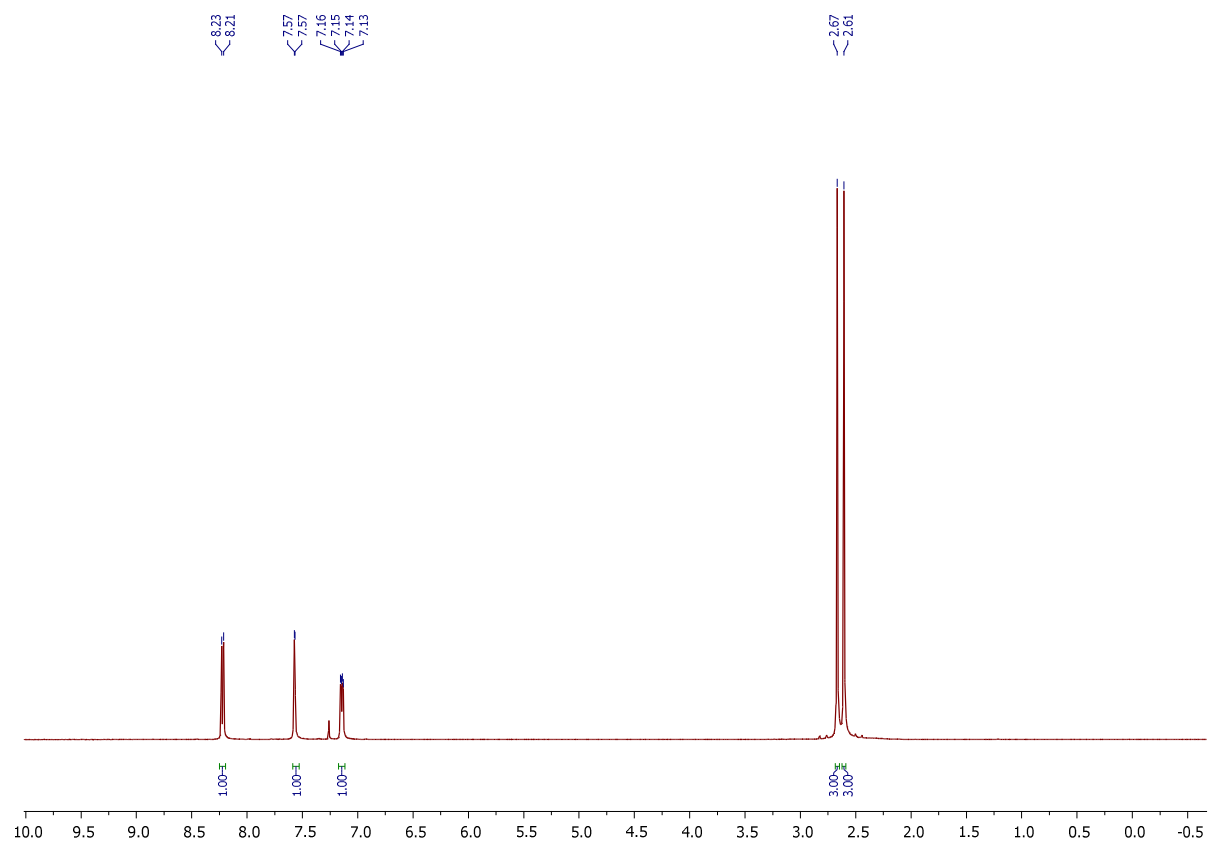

### 3g <sup>13</sup>C Spectrum

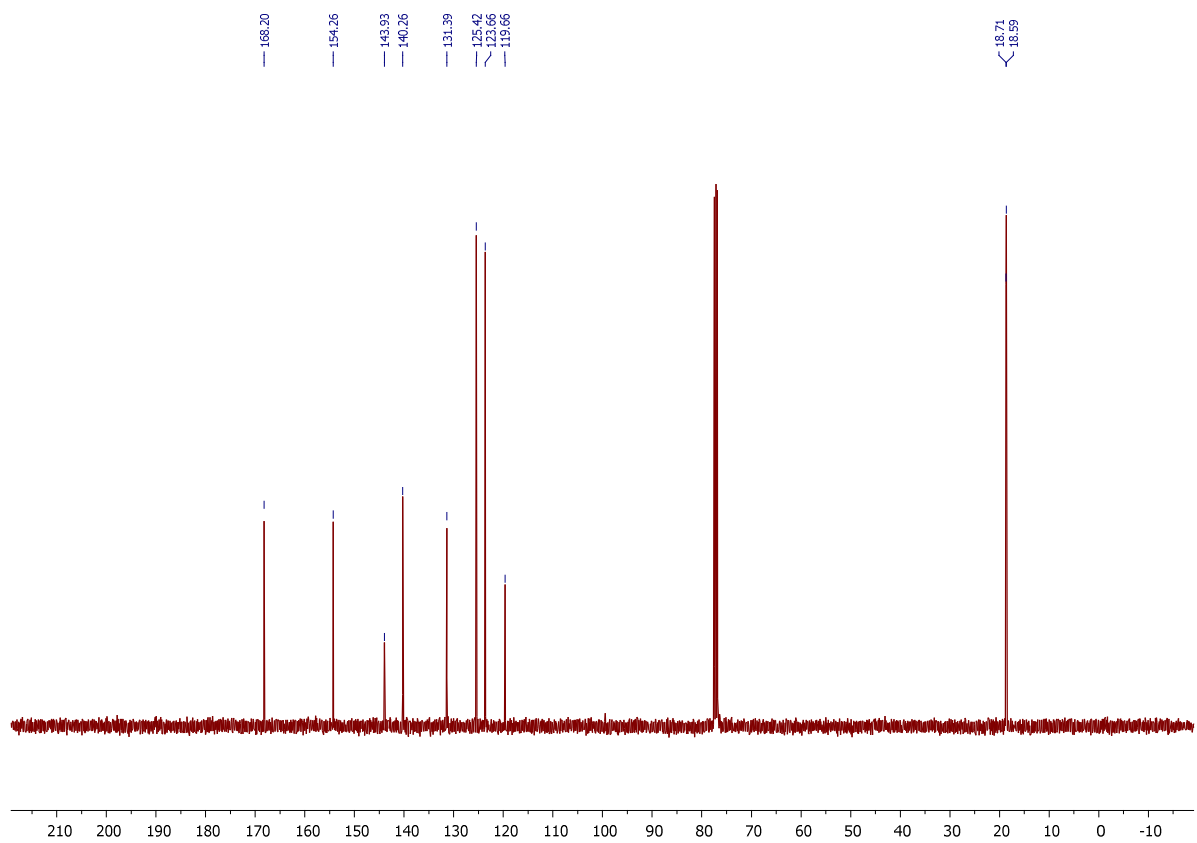

### 3g HRMS

CH3g MW=240?  
(MeOH)/MeOH + NH4OAc

EPSRC National Facility Swansea  
LTQ Orbitrap XL

Nicky John Willis  
07/05/2013 17:54:32

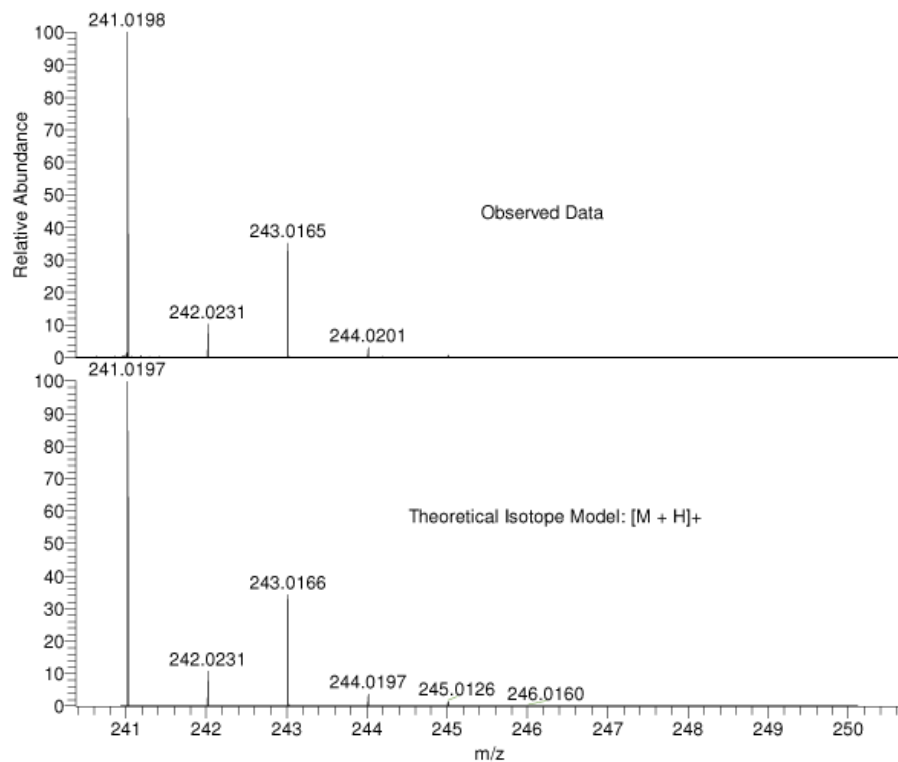

NL:  
3.16E6  
QMCBRA331-OJ-HNESP#35-  
49 RT: 0.86-1.26 AV: 15 T:  
FTMS + p NSI Full ms  
[120.00-2000.00]

NL:  
1.50E4  
C<sub>10</sub>H<sub>9</sub>ClN<sub>2</sub>OSH:  
C<sub>10</sub>H<sub>10</sub>Cl<sub>1</sub>N<sub>2</sub>O<sub>1</sub>S<sub>1</sub>  
p (gss, s /p:40) Chrg 1  
R: 100000 Res .Pwr . @FWHM

### 3h <sup>1</sup>H Spectrum

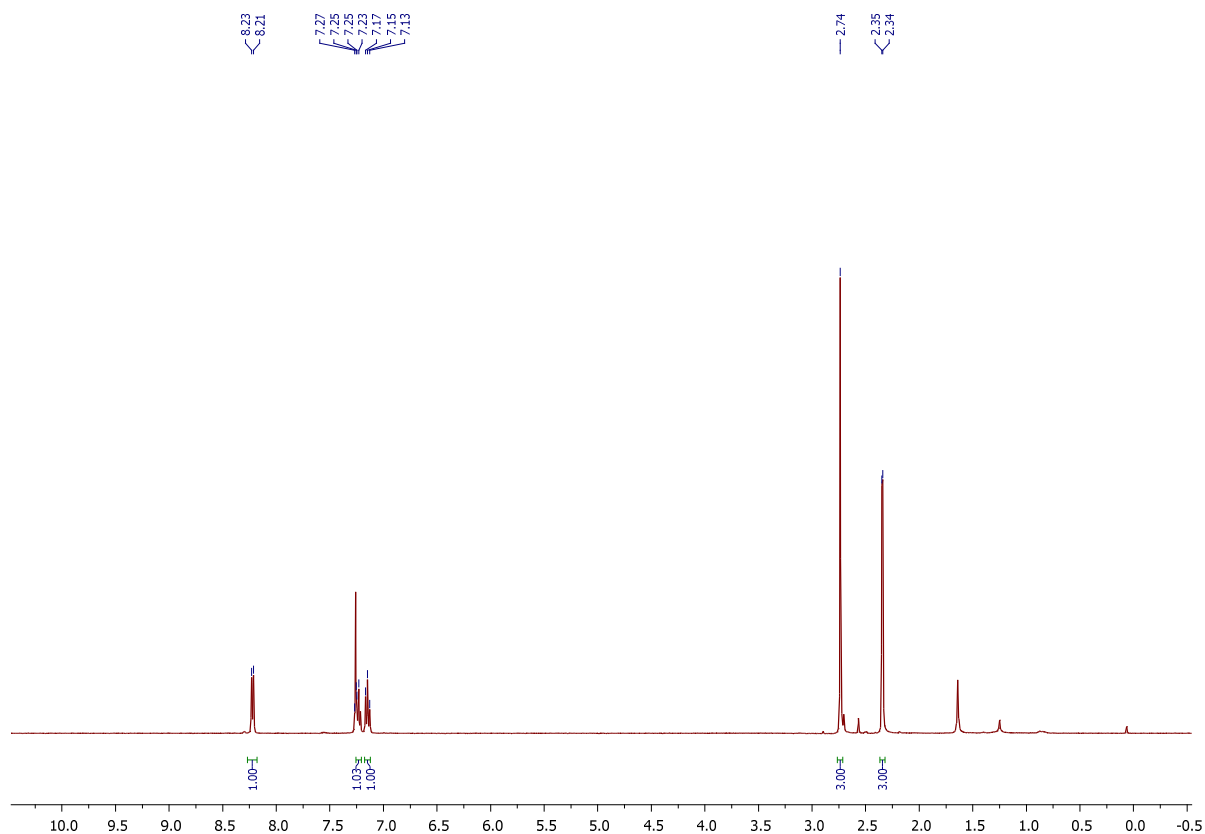

### 3h <sup>13</sup>C Spectrum

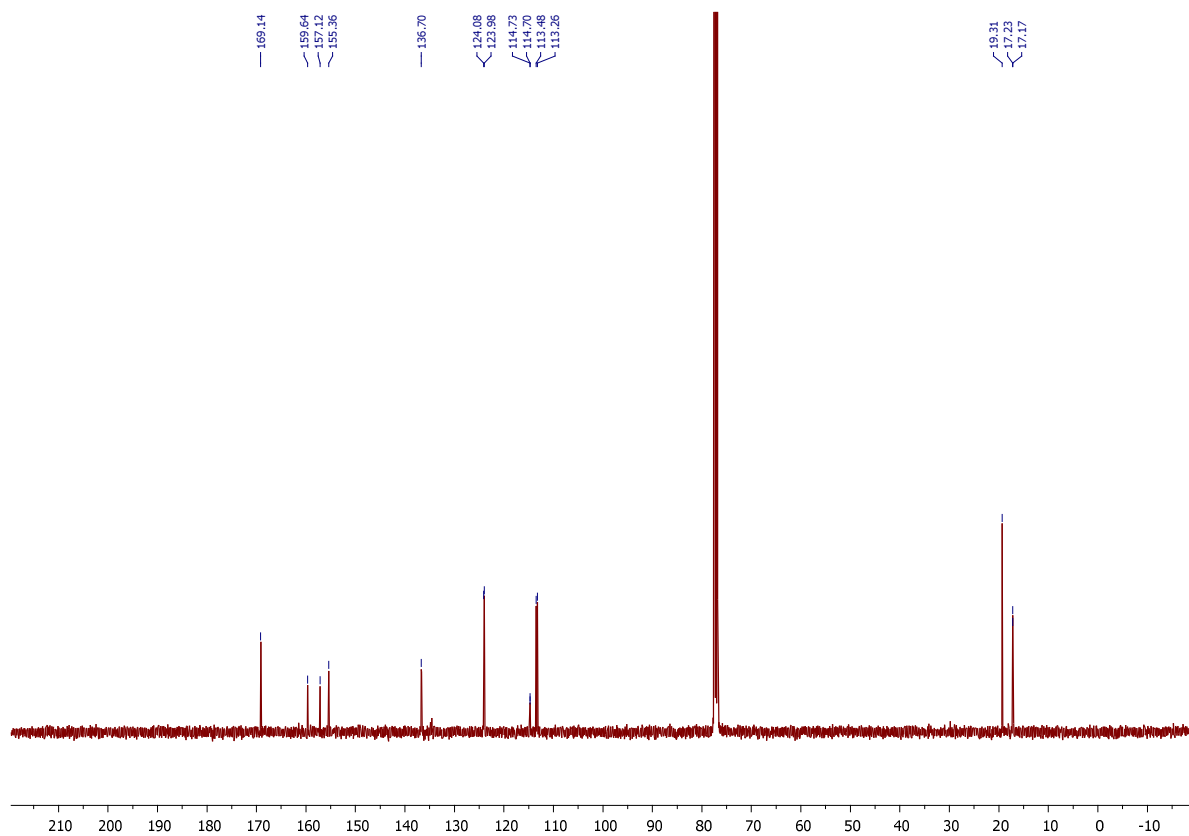

### 3h <sup>19</sup>F Spectrum

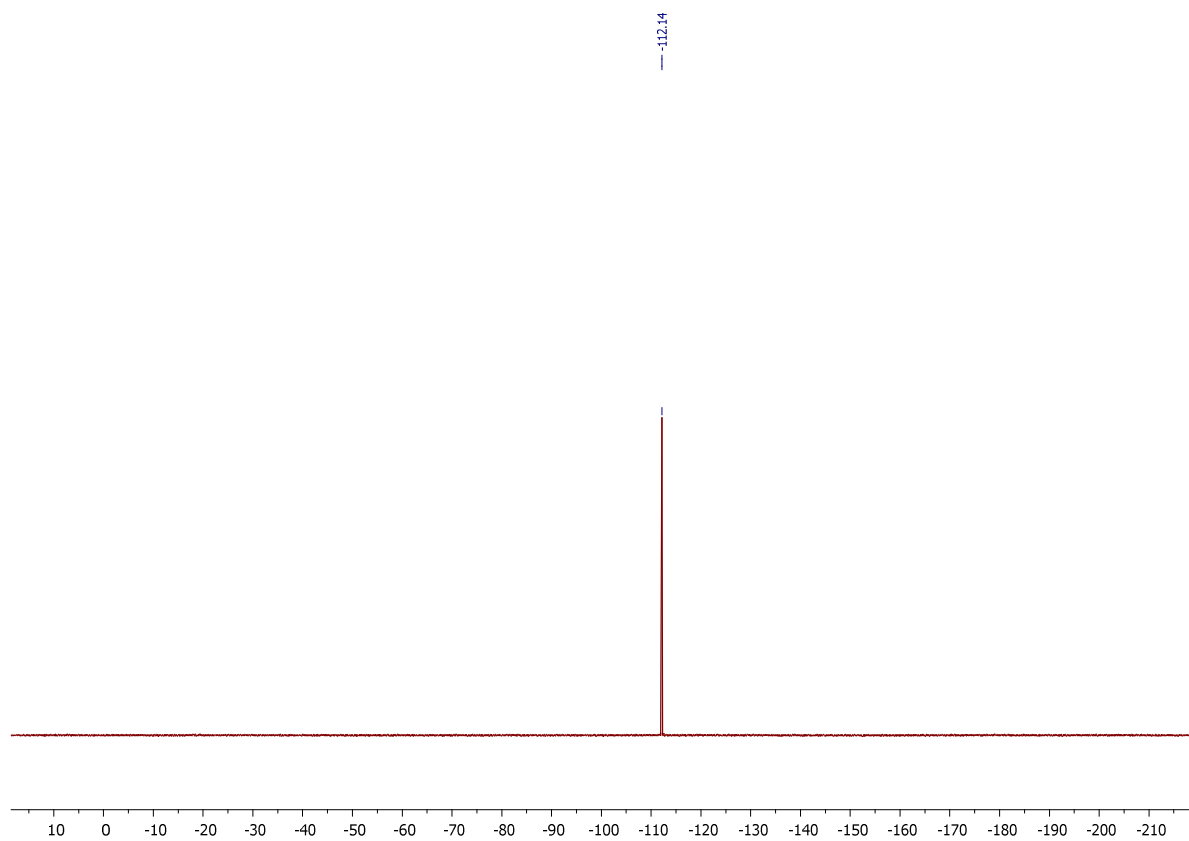

### 3h HRMS

CH3h MW=224?  
(MeOH)/MeOH + NH4OAc

EPSRC National Facility Swansea  
LTQ Orbitrap XL

Nicky John Willis  
07/05/2013 17:51:07

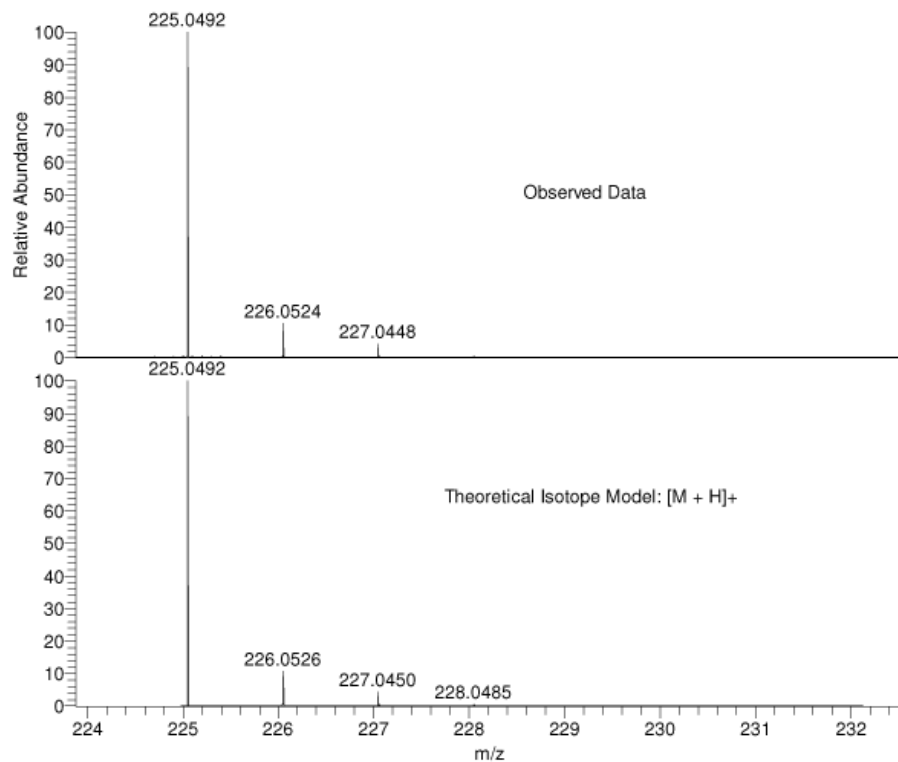

NL:  
8.63E6  
QMCBRA330-OJ-HNESP#32-  
49 RT: 0.77-1.25 AV: 18 T:  
FTMS + p NSI Full ms  
[120.00-2000.00]

NL:  
1.98E4  
C<sub>10</sub>H<sub>9</sub>FN<sub>2</sub>OSH:  
C<sub>10</sub>H<sub>10</sub>F<sub>1</sub>N<sub>2</sub>O<sub>1</sub>S<sub>1</sub>  
p (gss, s /p:40) Chrg 1  
R: 100000 Res .Pwr . @FWHM

### 3i <sup>1</sup>H Spectrum

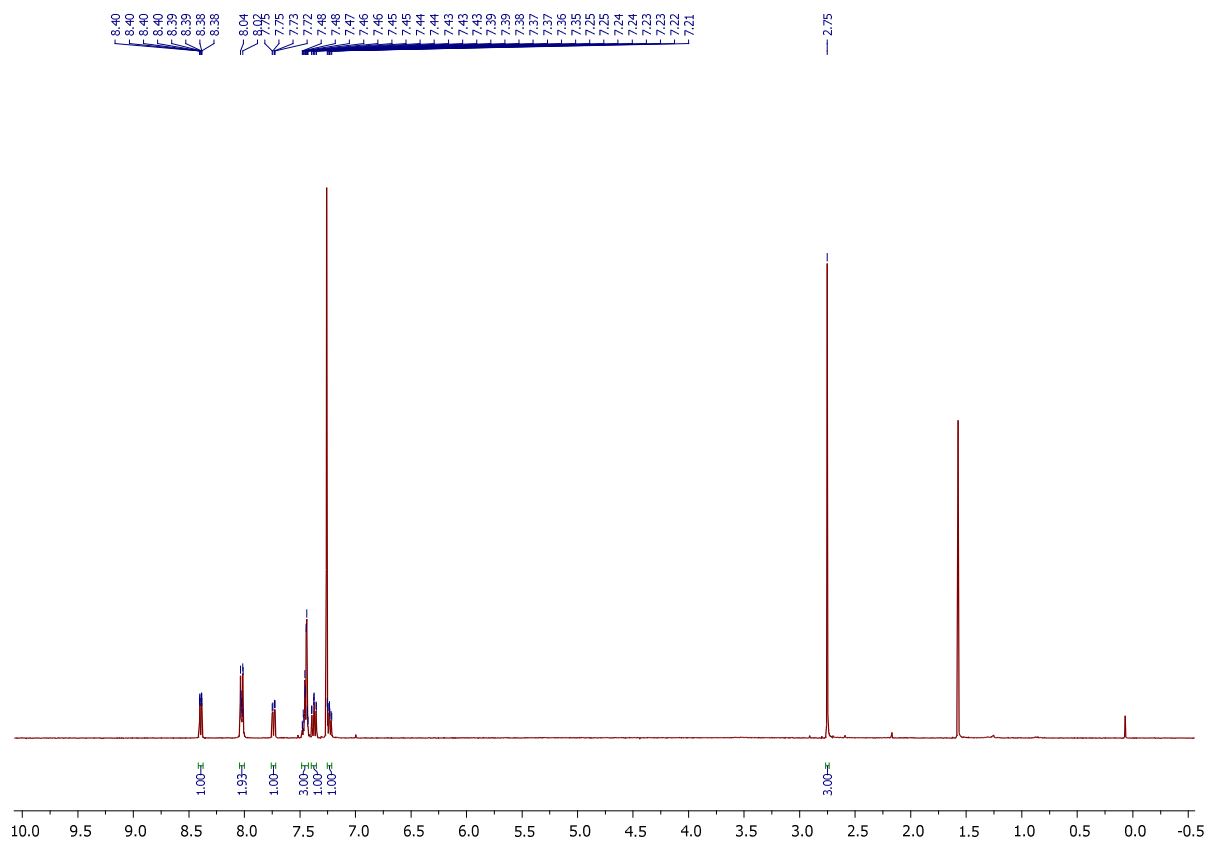



### 3i <sup>1</sup>H Spectrum

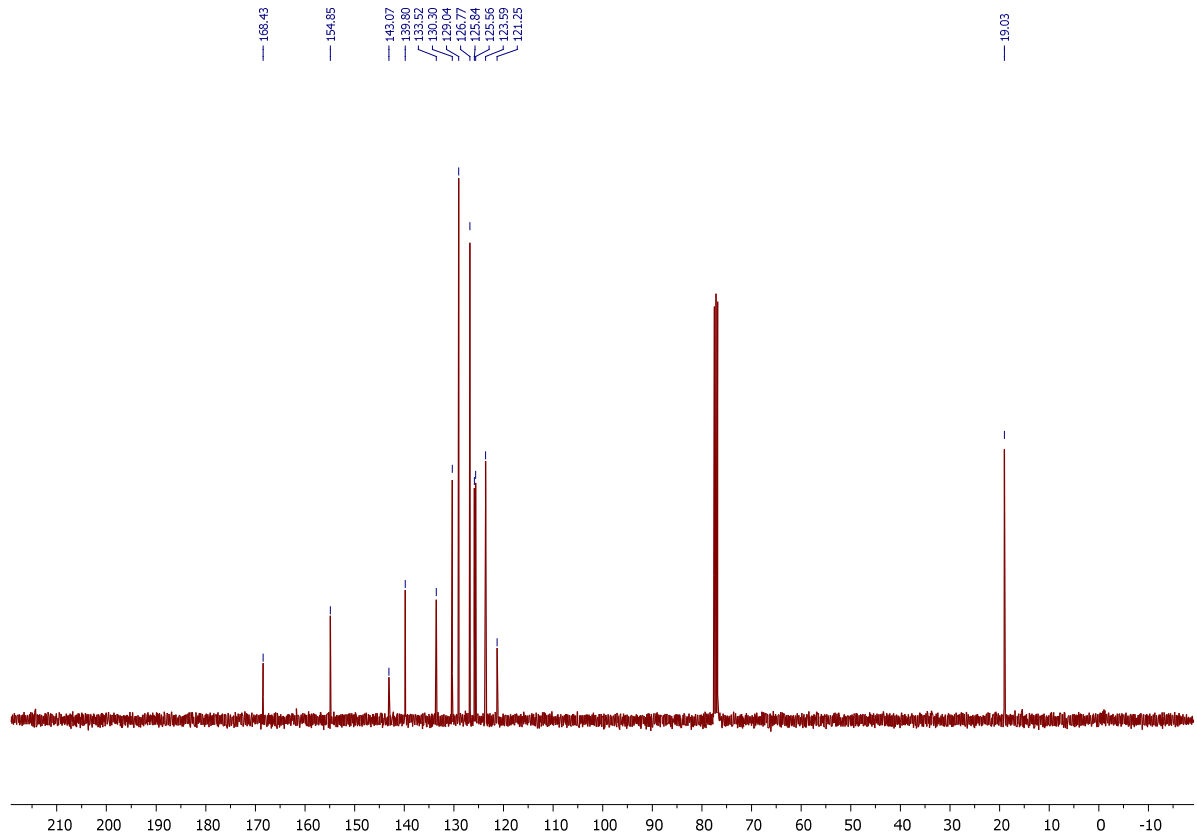

### 3i HRMS

CH3i MW=268?  
(MeOH)/MeOH + NH4OAc

EPSRC National Facility Swansea  
LTQ Orbitrap XL

Nicky John Willis  
07/05/2013 17:47:45

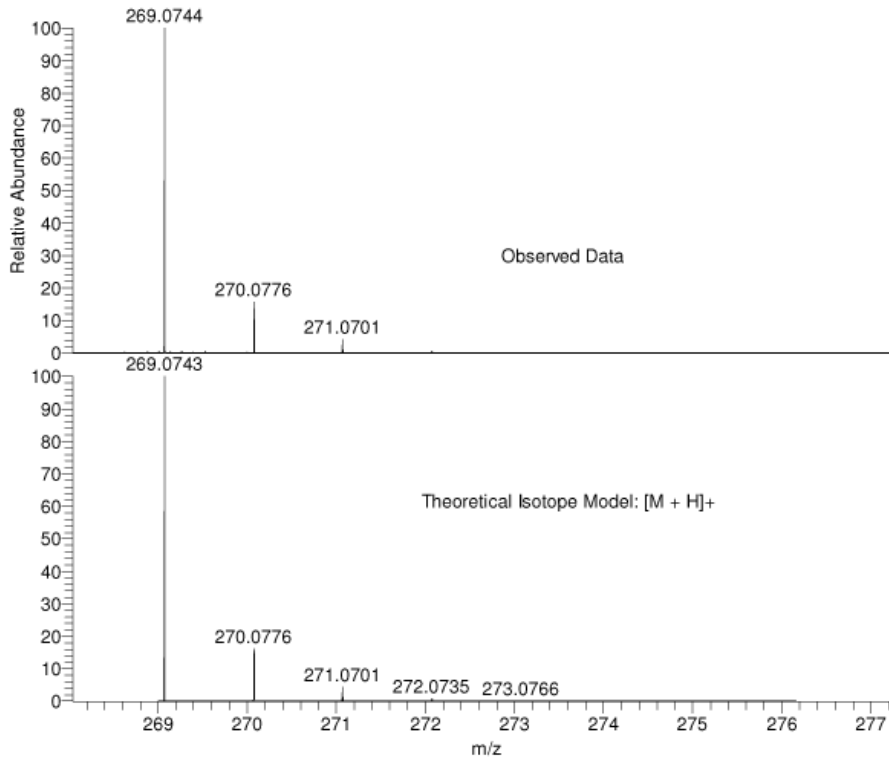

NL:  
1.10E7  
QMCBRA329-OJ-HNESP#34-  
42 RT: 0.80-1.03 AV: 9 T:  
FTMS + p NSI Full ms  
[120.00-2000.00]

NL:  
1.87E4  
C<sub>15</sub>H<sub>12</sub>N<sub>2</sub>OSH:  
C<sub>15</sub>H<sub>13</sub>N<sub>2</sub>O<sub>1</sub>S<sub>1</sub>  
p (gss, s /p:40) Chrg 1  
R: 100000 Res .Pwr . @FWHM

### 3j <sup>1</sup>H Spectrum

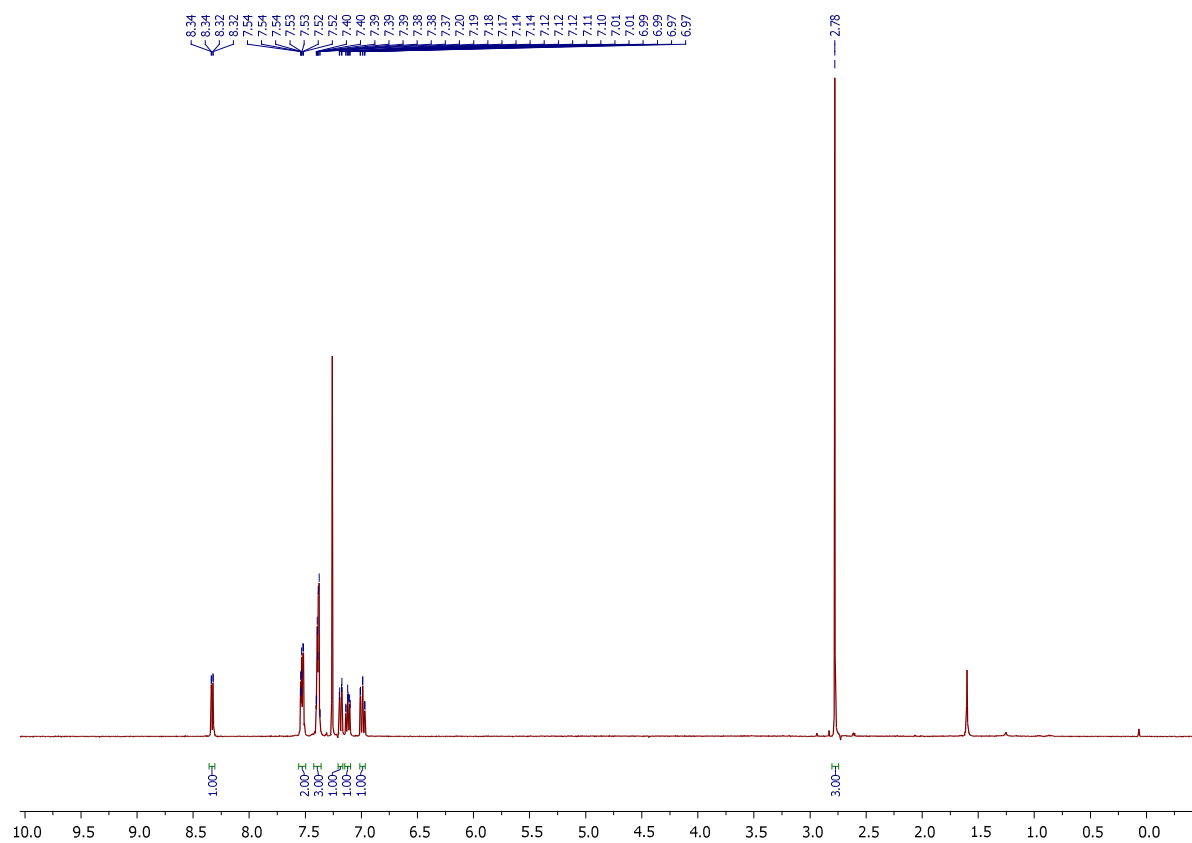

### 3j <sup>13</sup>C Spectrum

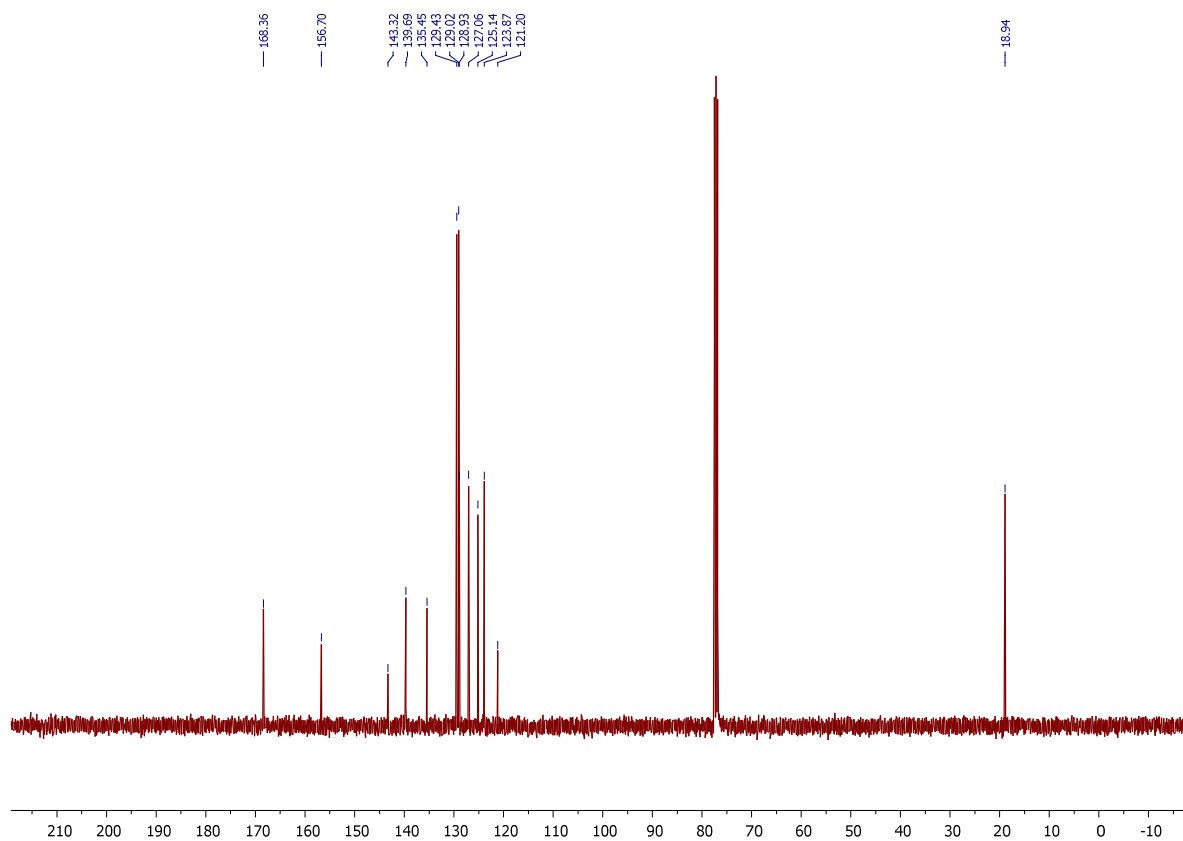

### 3j HRMS

CH3j MW=268?  
(MeOH)/MeOH + NH4OAc

EPSRC National Facility Swansea  
LTQ Orbitrap XL

Nicky John Willis  
07/05/2013 17:44:20

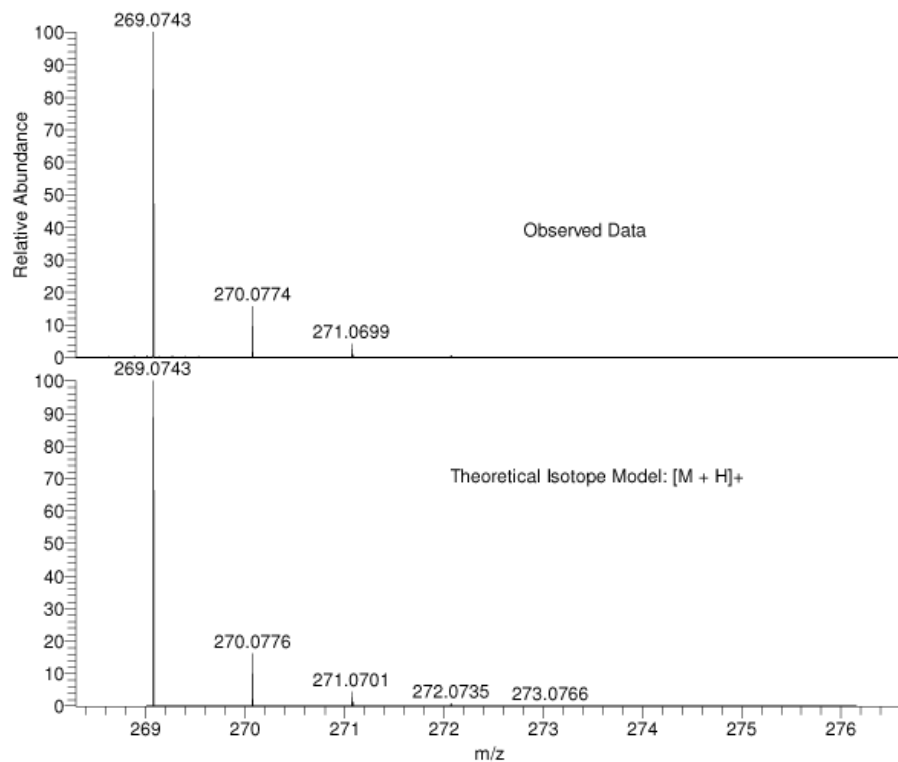

NL:  
3.73E7  
QMCBRA328-OJ-HNESP#35-  
44 RT: 0.82-1.07 AV: 10 T:  
FTMS + p NSI Full ms  
[120.00-2000.00]

NL:  
1.87E4  
C<sub>15</sub>H<sub>12</sub>N<sub>2</sub>OSH:  
C<sub>15</sub>H<sub>13</sub>N<sub>2</sub>O<sub>1</sub>S<sub>1</sub>  
p (gss, s /p:40) Chrg 1  
R: 100000 Res .Pwr . @FWHM
